1 ***Paraburkholderia edwinii* protects *Aspergillus* sp. from phenazines by acting as a toxin sponge**

2 Kurt M. Dahlstrom<sup>1</sup>, Dianne K. Newman<sup>1,2</sup>

3

4 <sup>1</sup>Division of Biology and Biological Engineering and <sup>2</sup>Division of Geological and Planetary Sciences,  
5 California Institute of Technology, Pasadena, CA, USA

6

7

8

9 Correspondence: Dianne K. Newman

10 Email: dkn@caltech.edu

11

12 ORCID: Kurt Dahlstrom,0000-0001-6590-6020 ; Dianne Newman, 0000-0003-1647-1918.

13

14

15

16

17

18 Keywords: phenazines, bacteria, fungi, protective partnership, microbial interactions, inter-kingdom

19

20 Author Contributions: K.M.D. performed the experiments. K.M.D and D.K.N. designed the research  
21 strategy, analyzed data, and wrote the paper.

22

23 This PDF file includes:

24 Main text, Figures 1 to 6

25 Supplemental Figures S1 to S4

26 Supplemental Tables S1 & S2

27 **Summary**

28           Many environmentally and clinically important fungi are sensitive to toxic, bacterially-produced,  
29 redox-active molecules called phenazines. Despite being vulnerable to phenazine-assault, fungi inhabit  
30 microbial communities that contain phenazine producers. Because many fungi cannot withstand  
31 phenazine challenge, but some bacterial species can, we hypothesized that bacterial partners may protect  
32 fungi in phenazine-replete environments. In the first soil sample we collected, we co-isolated several such  
33 physically associated pairings. We discovered the novel species *Paraburkholderia edwinii* and  
34 demonstrated it can protect a co-isolated *Aspergillus* species from phenazine-1-carboxylic acid (PCA) by  
35 sequestering it, acting as a toxin sponge; in turn, it also gains protection. When challenged with PCA, *P.*  
36 *edwinii* changes its morphology, forming aggregates within the growing fungal colony. Further, the  
37 fungal partner triggers *P. edwinii* to sequester PCA and maintains conditions that limit PCA toxicity by  
38 promoting an anoxic and highly reducing environment. A mutagenic screen revealed this program  
39 depends on the stress-inducible transcriptional repressor HrcA. We show that one relevant stressor in  
40 response to PCA challenge is fungal acidification and that acid stress causes *P. edwinii* to behave as  
41 though the fungus were present. Finally, we reveal this phenomenon as widespread among  
42 *Paraburkholderia* with moderate specificity among bacterial and fungal partners, including plant and  
43 human pathogens. Our discovery suggests a common mechanism by which fungi can gain access to  
44 phenazine-replete environments, and provides a tractable model system for its study. These results have  
45 implications for how rhizosphere microbial communities as well as plant and human infection sites are  
46 policed for fungal membership.

47

48

49

50

51

52

## 53 **Introduction**

54           The presence or absence of particular fungal species in host-associated microbial communities  
55 plays a central role in human and plant health, crop yield, and climate change<sup>1-3</sup>. However, we lack an  
56 understanding of how key fungal species are integrated into these communities in the face of rampant  
57 chemical warfare. It has long been known that the soil is home to diverse microbes that produce natural  
58 products with antibiotic activity. Important amongst these are phenazines, redox active compounds that  
59 can restrict fungal growth and have been shown to be responsible for excluding fungi from agriculturally  
60 important microbial communities<sup>4,5</sup>. A recent metagenomic study revealed that phenazine biosynthesis  
61 capacity is widespread in agricultural soils and crop microbiomes<sup>6</sup>. Given that drier soils are also  
62 associated with higher rates of phenazine producers colonizing wheat, this suggests that soil fungi may  
63 need to contend with higher concentrations of phenazines as the climate shifts<sup>7,8</sup>. Paradoxically, many  
64 fungi that are sensitive to phenazines are routinely found living in close proximity to phenazine-producing  
65 bacteria, including pathogenic fungi in the lungs of cystic fibrosis patients, beneficial and  
66 phytopathogenic fungi in the rhizosphere, and in oceanic environments including coral<sup>9-12</sup>. This pattern  
67 of co-habitation indicates there may be a general way fungi are screened for membership in microbial  
68 communities that produce phenazines that holds broad relevance. We set out to identify such a putative  
69 screening mechanism, a necessary step towards the goal of manipulating these microbial communities for  
70 human benefit.

71           Our drive to understand how particular fungi are incorporated or rejected from a microbial  
72 community is motivated by the large impact fungal composition can have on the outcome for human and  
73 plant health. Fungi in complex polymicrobial infections act as markers of disease severity, particularly in  
74 the lungs of patients with cystic fibrosis<sup>13</sup>. In this environment, *Aspergillus fumigatus* and *Candida*  
75 *albicans* are two opportunistic fungal pathogens that are susceptible to phenazines, yet are routinely  
76 isolated from patients who are co-infected with the prolific phenazine producing bacterium *Pseudomonas*  
77 *aeruginosa*<sup>9,10</sup>. Likewise, fungi play prominent roles in the rhizosphere, where they can help the host

78 plants acquire nutrients and water as well as withstand stress and pathogens <sup>14,15</sup>; plant-growth promoting  
79 fungi such as *Trichoderma* and *Penicillium* species are often found in rhizospheres containing phenazine  
80 producing bacteria, yet their growth is inhibited by phenazines <sup>11,16</sup>. Conversely, the ability of  
81 phytopathogenic fungi to enter the rhizosphere is of interest due to fungi being responsible for a third of  
82 all lost crops annually <sup>17</sup>. This is despite phenazines being credited as a primary factor in stopping a  
83 variety of fungal phytopathogens from infecting food crops, including pseudomonads that can suppress  
84 *Gaeumannomyces graminis* var. *tritici* and *Fusarium oxysporum* f sp. *radicis-lycopersici*, two fungal  
85 pathogens of tomato and wheat, respectively <sup>4,5</sup>. Finally, plant associated fungi known as mycorrhizae  
86 play an outsized role in carbon sequestration: mycorrhizae-associated vegetation sequester approximately  
87 350 gigatons of carbon a year compared to 29 gigatons stored by nonmycorrhizae-associated vegetation <sup>3</sup>.  
88 Notably, phenazine producers are found in diverse environments beyond food crops, including in forests  
89 and grasslands, thus pointing to another niche of consequence where fungi must navigate phenazine  
90 assault <sup>6</sup>.

91         How do fungi maintain an active presence in microbial communities where they run the risk of  
92 encountering phenazines? Recognizing that some soil bacteria can tolerate phenazines well <sup>18-20</sup>, we  
93 hypothesized that one mechanism by which fungi might gain navigate such hostile environments is  
94 through association with a protective bacterial partner. Precedent for such relationships exists. For  
95 example, members of the *Burkholderiaceae* family form associations with fungi. *Trichoderma asperellum*  
96 is a biocontrol fungus that suppresses the wheat pathogen *Fusarium oxysporum*. *Paraburkholderia terrae*  
97 associates with the mycelium of *T. asperellum* and can be induced to migrate in the direction of mycellial  
98 growth, as well as promote fungal growth in the presence of crude supernatant derived from antagonistic  
99 bacteria <sup>21</sup>. However, this family of bacteria can also empower pathogenic fungi. *Rhizopus microsporus*  
100 is a necrotic plant pathogen of rice. The primary toxin it secretes that is required for infection is actually  
101 produced by the intracellular bacterium *Paraburkholderia rhizoxinica* that resides inside the fungal cells  
102 <sup>22</sup>. Other *Paraburkholderia* with less clear roles associate extracellularly with fungal pathogens, such as

103 *P. fungorum*, found isolated with the white-rot fungus *Phanerochaete chrysosporium*<sup>23</sup>. While the  
104 roles each of these bacteria play for their host fungus may differ, fungal association with bacteria of  
105 this family is well established.

106 In addition to these isolated examples, data from a recent metagenomic survey of soil microbes  
107 across many climate conditions support the notion that cooperation with bacteria might underpin fungal  
108 ecological success<sup>24</sup>. Specifically, this study found that the presence of bacterially-derived genes  
109 regulating antibiotic tolerance were correlated with fungal biomass in the community. Although this co-  
110 occurrence was suggested to indicate inter-domain antagonism, where bacterial groups use these genes to  
111 defend themselves against fungally-produced antibiotics, an alternative and non-mutually exclusive  
112 explanation may be that these bacterial stress response genes help fungi navigate an otherwise  
113 inhospitable environment. Given that fungi can be excluded from microbial communities by phenazine-  
114 producing bacteria, it stands to reason other phenazine resistant bacteria in the community that associate  
115 with fungi may have the power to affirm their presence. Because the number of environments where  
116 susceptible fungi are found living in proximity to phenazine producers is likely to be high, we reasoned  
117 that finding an example of such a hypothetical protective association could be of great value in  
118 understanding the recruitment versus repression of fungi in microbial communities containing phenazine  
119 producers.

120 Accordingly, we set out to identify a model bacterial/fungal partnership in the presence of  
121 phenazines. Using an accessible soil on the Caltech campus from which we had previously isolated  
122 phenazine degrading bacteria<sup>19</sup>, we designed a procedure to select for such partnerships. Here, we report  
123 the isolation and initial mechanistic characterization of a genetically tractable fungal-bacterial system  
124 where the bacterial partner protects the fungus from PCA assault. The ease with which we were able to  
125 experimentally validate the existence of a hypothetical bacterial/fungal association suggests that this type  
126 of partnership may be widespread in nature.

127

128 **Results**

129

130 **Isolation of protective bacterial partner and physically associated fungus.**

131

132 To identify fungi that resist phenazine assault with protective bacterial partners, we sampled  
133 topsoil from the base of a blood orange citrus tree outside of the Beckman Institute on the Caltech  
134 campus. We chose this site because soil represents an easily accessible and broad niche containing many  
135 microbial species and because we had isolated a strain of *Mycobacterium* from this same plot that can  
136 degrade phenazines, suggesting the presence of bacteria capable of producing and interacting with these  
137 molecules <sup>19</sup>.

138 We collected the top three centimeters of soil from this site, and developed a protocol to find  
139 strong bacterial-fungal pairs. We washed and sonicated 100 mg to separate microbes that were not  
140 strongly associated with one another, thereby enriching for strongly adherent partners (**Fig. 1A**). To select  
141 a first fungal culture, the washed samples were diluted to extinction and plated on potato dextrose agar.  
142 Fungal colonies that grew after approximately three days were screened for the presence of bacteria via  
143 PCR amplification of the 16S rDNA region. Fungal/bacterial pairings were then challenged with 300  $\mu$ M  
144 phenazine-1-carboxylic acid (PCA). We used PCA because it is the biosynthetic starting product for  
145 modification into more specialized phenazine types and is known to play important roles in excluding  
146 fungal pathogens from wheat rhizosphere communities <sup>5</sup>. Co-colonies that were able to grow when  
147 challenged with PCA were repeatedly sub-cultured to isolate the partner bacterium, while the fungus was  
148 re-plated in the absence of PCA with bacteriocidal antibiotics to cure it of the bacterium. Isolated fungi  
149 and bacteria were retreated with PCA to check phenazine-sensitivity and tolerance, respectively, and  
150 susceptible fungi were then supplemented with their co-isolated bacterium in the presence of PCA to  
151 confirm that the partner bacterium conferred phenazine tolerance.

152 Using this process we uncovered three fungal-bacterial partnerships. Genus-level identification  
153 was performed with ITS and 16S rDNA sequencing, respectively. Two *Paraburkholderia* isolates were

154 found protecting an *Aspergillus* and a *Lecytophora* isolate. A *Luteibacter* species also provided  
155 protection to a second *Aspergillus* isolate (**Fig. S1A**). In each case, the fungal growth was negatively  
156 impacted when challenged with PCA alone, but was restored to varying degrees when supplemented with  
157 its natively co-isolated bacterial partner. Of these three co-isolates, we selected the *Paraburkholderia*-  
158 *Aspergillus* pairing for further analysis due to the dramatic level of protection the bacterium provided the  
159 fungus, as well as the radical morphological change the bacterium underwent as it formed spherical  
160 aggregates within the fungal colony when the two were challenged with PCA (**Fig. 1B**). Moreover, while  
161 the *Aspergillus* species is sensitive to PCA and *P. edwinii* resists its toxic effects, *P. edwinii* is still  
162 vulnerable to engulfment by the PCA producer *P. fluorescens*, but not to a strain that cannot make PCA,  
163 suggesting a mutual benefit (**Fig. 1B**). Finally, this pairing was attractive because previous reports of  
164 *Burkholderiaceae* family members being isolated with fungi<sup>21,25</sup> suggested that such associations may be  
165 common in the soil. Due to this bacterium's ability to help its fungal partner prosper despite the presence  
166 of a toxin, and its phylogenetic placement, we named it *Paraburkholderia edwinii*, derived from the Old  
167 English "Edwin", meaning prosperous friend.

168

### 169 ***P. edwinii* protects its fungal partner from phenazine assault**

170

171 We next sought to characterize the range of the bacterium's ability to protect its partner fungus  
172 from phenazines. The minimal inhibitory concentration of PCA toward fungal targets has been reported to  
173 be in the 1-50  $\mu\text{M}$  range<sup>26</sup>. The 300  $\mu\text{M}$  PCA used for our isolation assay therefore represents a strong  
174 phenazine challenge intended to identify bacterial partners with a robust protection phenotype. The  
175 advantage of using a high concentration of PCA in our laboratory experiments is that it may better mimic  
176 local gradients of PCA that exist within rhizosphere microbial communities that likely exceed bulk  
177 measurements.

178 To determine whether *P. edwinii* can protect *Aspergillus* against actual phenazine-producers in  
179 addition to purified PCA, we tested the response in the presence of different phenazine-producing

180 *Pseudomonads*. *Aspergillus* was plated adjacent to *Pseudomonas fluorescens*, *Pseudomonas*  
181 *chlororaphis*, *Pseudomonas chlororaphis* sub-species *aureofaciens*, and *Paraburkholderia phenazinium*.  
182 The primary phenazine product made by these species under are growth conditions is PCA, phenazine-1-  
183 carboxamide (PCN), 2-hydroxy-phenazine, and iodinin, respectively. When grown close to one another,  
184 each phenazine producing bacterium impeded *Aspergillus* growth (**Fig. 1C**). However, when the fungus  
185 was supplemented with *P. edwinii*, growth was partially restored. Intriguingly, bacterial aggregates again  
186 formed within the co-colonies proximal to phenazine producers, suggesting this morphological phenotype  
187 reflected a general protective response (**Fig. 1C**). Finally, to verify that these responses were specifically  
188 due to phenazine assault, mutants of *Pseudomonas fluorescens* and *Pseudomonas chlororaphis* were  
189 obtained that could not make phenazines<sup>27</sup>. While the WT strains were capable of suppressing fungal  
190 growth, the fungus grew unimpeded in proximity of the non-phenazine producing mutants (**Fig. S1B**),  
191 confirming that the protection provided by *P. edwinii* is specific to phenazine assault and can occur in a  
192 mixed microbial system.

193

#### 194 ***P. edwinii* undergoes a morphological shift in response to phenazine-induced fungal stress.**

195

196 To understand how *P. edwinii* responds to its partner fungus during phenazine assault, we imaged  
197 the bacterium inside the co-colony. While a ring of what appeared to be one or two dozen bacterial  
198 aggregates formed on the co-colony surface, it remained possible these were fungal structures. To  
199 distinguish between these possibilities, we adapted a tissue clearing technique developed in our lab  
200 termed Microbial identification after PASSIVE Clarity Technique (MiPACT) to render the fungal tissue  
201 transparent (see Materials and Methods). This allowed us to visualize bacteria within the fungal structure  
202 using *in situ* fluorescence detection of 16S rRNA with the hybridization chain reaction (HCR)<sup>28</sup>.  
203 Because the exterior of the colonies showed putative bacterial aggregates within the center, we  
204 hypothesized that may be where the bacteria were concentrated. We first imaged the outer 2/3 of the  
205 colonies. In the control, whole-colony samples untreated with PCA, *P. edwinii* was found concentrating



206 near the tips of the outwardly-growing mycelium, with relatively low amounts of bacteria found further  
207 inward among older mycelial growth. The propensity of *P. edwinii* to track with the mycelial edge in the  
208 untreated samples is in agreement with reports suggesting other *Paraburkholderia* are capable of  
209 identifying the growing edge of expanding fungi<sup>21</sup>. Conversely, in the PCA treated sample, this  
210 population of bacteria was largely absent (**Fig. 2**).

211 To gauge whether a lack of bacteria among the outer mycelium in the PCA treated samples was  
212 due to bacterial aggregation, we imaged the center of each co-colony. In untreated samples, bacteria were  
213 mixed homogeneously throughout the fungal mass without identifiable structure or patterning (**Fig. 2**). One  
214 exception to this observation was an apparent transition zone between the bacterially rich inner co-colony  
215 and more sparsely populated outer co-colony. This transition zone, or ring, comprised more densely  
216 packed bacteria, but the region lacked further organization (**Fig. S2**). In the PCA treated sample, the  
217 center of the co-colony contained clear spherical structures that lit up with the eubacterial HCR probes  
218 (**Fig. 2**). These *P. edwinii* aggregates ranged from 50 to 100  $\mu\text{m}$  in diameter and were ubiquitous  
219 throughout the colony center, indicating that the visible bacterial aggregates on the surface of the co-  
220 colony were only a fraction of those being formed. The PCA treated co-colony also had a transition ring  
221 structure between the bacterially populated center and unpopulated outer colony. In this case, however,  
222 the ring contained more clearly defined aggregates of bacteria, corresponding to the region that produced  
223 aggregates visible to the naked eye (**Fig. S2**). These results reveal that *P. edwinii* forms bacterial  
224 aggregates inside and in the center of the fungal colony when challenged with PCA.

225

### 226 *P. edwinii* acts as a toxin sponge

227

228 How does *P. edwinii* offer resistance from phenazine assault to its partner fungus? Possible  
229 mechanisms included phenazine degradation, sequestration, and/or detoxification. We first tested  
230 degradation. To accurately measure the PCA concentration over time, we grew *P. edwinii* in shaking

231 liquid cultures spiked with 300  $\mu$ M PCA either alone or in the presence of the *Aspergillus* species, in case  
232 a fungal signal was necessary to trigger degradation of PCA. In no condition was PCA degraded (**Fig.**  
233 **S3**). The lack of degradation suggested that bacterial aggregate formation might instead reflect a PCA  
234 sequestration and detoxification response, which we proceeded to test.

235         Because the bacterial aggregates are too small to probe or manipulate individually, we modified  
236 our experimental set up to grow *P. edwinii* directly next to its *Aspergillus* partner in the presence of PCA  
237 to generate bacterial auto-aggregation in the form of a colony. To verify the protection phenotype is still  
238 responsive in this assay, we grew the two organisms next to each other in the presence and absence of  
239 PCA. Growing *P. edwinii* and the *Aspergillus* species at a distance in the presence of PCA resulted in  
240 severely stunted fungal growth, however the fungus was able to grow toward *P. edwinii* when plated  
241 adjacently (**Fig. 3A**). Intriguingly, the bacterial colony developed a deep yellow hue in the PCA treated  
242 condition, but only did so in the presence of the fungus. PCA is a largely colorless molecule when  
243 exposed to oxygen, but in the reduced state turns yellow. We used LC-MS to determine whether this  
244 yellow pigment was PCA and its presence was confirmed in the bacterial sample grown next to the  
245 fungus (**Fig. 3B**). We detected a smaller amount of PCA in the colonies of *P. edwinii* grown alone in the  
246 presence of PCA than in the presence of PCA and the fungus, suggesting that while PCA sequestration  
247 may be an intrinsic trait of the bacterium, sequestration is stimulated by the fungal partner (**Fig. 3C**).

248         Having confirmed the presence of PCA within the bacterial colonies, we next wanted to assess its  
249 redox state. Previously, we had been measuring PCA sequestered from an agar plate where most of the  
250 molecule would be expected to be oxidized due to atmospheric oxygen. A better comparator for the  
251 fraction of reduced PCA found within a *P. edwinii* colony would therefore be another bacterial colony  
252 containing PCA, but one that was not employing a protection response involving PCA detoxification. To  
253 this end, we grew *P. edwinii* and the *Aspergillus* species adjacent to the phenazine producer *P.*  
254 *fluorescens*. PCA is the sole phenazine produced by *P. fluorescens*. Before the bacterial colonies were  
255 harvested, the plates were transferred to an anaerobic chamber to minimize the atmospheric oxidation of  
256 any reduced PCA. Reduced, but not oxidized, PCA has a peak excitation of 364 nm and emission of 520

257 nm, which allowed us to determine the fraction of the PCA in the reduced state. Fluorescent emission  
258 spectra were collected in the anaerobic chamber, which revealed the phenazine-producing *P. fluorescens*  
259 colony biofilm to contain approximately 10% of its PCA in the reduced state whereas *P. edwinii* colonies  
260 maintained approximately a third of the PCA it sequestered in the reduced state. This result demonstrated  
261 that *P. edwinii* colony aggregates reduce PCA (**Fig. 3D**).

262

### 263 **HrcA is a regulator of the protection response in *P. edwinii***

264

265         Given that PCA sequestration in *P. edwinii* is stimulated by its partner fungus, we aimed to  
266 discover how *P. edwinii* sensed and responded to its partner. We developed genetic tools to manipulate *P.*  
267 *edwinii* to screen for mutants altered in their ability to protect the fungus from PCA. Because *P. edwinii* is  
268 a novel soil isolate, we sequenced its genome using Illumina and PACBio technologies. Two closed  
269 chromosomes resulted upon assembly. Because most members of the *Burkholderiaceae* family contain an  
270 additional third genetic element that can range in size from one or more plasmids to a small third  
271 chromosome, we attempted to also isolate smaller genetic components. However, unlike many closely  
272 related species of *Paraburkholderia*, no plasmid was recovered. *P. edwinii* appeared to be a novel species,  
273 with the closest match being *Paraburkholderia SOS3*, with 88% average nucleotide identity shared  
274 between the two. We also sequenced the *Aspergillus* species, and we report an assembly of 26 contigs  
275 greater than 0.5 MB accounting for ~38 MB. See materials and methods section for more details.

276         We developed a mating protocol to introduce a mini-mariner transposon<sup>29</sup> into the genome of *P.*  
277 *edwinii*. Mutants were screened with the *Aspergillus* species on PCA, and mutants that produced an  
278 atypical morphology had their transposons mapped to the inserted gene (Supplementary Table 1). *P.*  
279 *edwinii* mutants were identified that were either less or more protective of the partner fungus. Generally,  
280 more bacterial aggregation was associated with more fungal protection and vice versa (**Fig. 4A**). We  
281 focused on a mutant with a transposon insertion in the stress inducible transcriptional repressor *hrcA*, due  
282 to its strong protection phenotype and relative ease of growth. To ensure its phenotype was due to the

283 disruption of this gene and was not caused by polar effects or secondary mutations elsewhere in the  
284 genome, we made an in-frame deletion of *hrcA*. The deletion mutant phenocopied the transposon mutant,  
285 showing enhanced bacterial aggregation and fungal growth when challenged with PCA (**Fig. 4B, C**).  
286 Constitutively expressing *hrcA* from a pBBR1 vector restored the WT phenotype (**Fig. 5B**). Not only did  
287 the  $\Delta hrcA$  mutant promote fungal growth beyond the wild type strain during PCA challenge, but the  
288 extra-large bacterial aggregates characterizing this mutant appeared to form even in the absence of PCA,  
289 suggesting this mutant constitutively turned on the protection program (**Fig. S4A**).

290 Intriguingly, the *hrcA* gene product in *Bacillus subtilis* represses expression of genes involved in  
291 the stress response to heat shock, and deletion of *hrcA* in *B. subtilis* results in cells that can adapt and  
292 grow more rapidly under conditions of heat stress<sup>30</sup>. By analogy, we wondered whether the removal of  
293 *hrcA* in *P. edwinii* might permit larger aggregate formation due to a similar growth advantage in the  
294 presence of PCA. To test this, we grew WT and  $\Delta hrcA$  strains as co-colonies with the *Aspergillus* species  
295 in the presence or absence of PCA. Co-colonies were homogenized after 48 hours and bacterial CFUs  
296 were plated on potato dextrose agar containing nystatin to suppress fungal growth. The  $\Delta hrcA$  strain  
297 showed an approximately 2-fold increase in CFUs compared to the WT per co-colony in both the PCA  
298 treated and untreated conditions (**Fig. 4D**). Not only did the  $\Delta hrcA$  mutant grow better than the WT in the  
299 presence of PCA, it was better at sequestering PCA; as before, its ability to sequester PCA was stimulated  
300 in the presence of the fungus (**Fig. 4E**). Because the amount of PCA sequestered is normalized by the dry  
301 weight of the collected biomass, a growth advantage alone is not sufficient to explain these results.

302 Though bacterial aggregation in the  $\Delta hrcA$  mutant was enhanced relative to the WT, it failed to form a  
303 biofilm using the crystal violet assay<sup>31</sup>—possibly linked to a swimming motility defect we uncovered  
304 using a swim assay(**Fig. 4F**). These results suggest that the protection/aggregation phenotype relies on a  
305 different developmental program from that involved in classical biofilm development.

306

307 ***P. edwinii* holds sequestered PCA in a reduced, anoxic environment**

308

309 Phenazines exert toxic effects on diverse cell types through a variety of mechanisms including  
310 generating reactive oxygen species and destabilizing the electron transport chain of the target cell  
311 dependent upon the ability of the phenazine to cycle its redox state in the presence of oxygen<sup>13,32–37</sup>. It  
312 may therefore seem paradoxical that the *Aspergillus* species achieves protection against PCA by  
313 promoting concentration of PCA within its co-culture. Given that *P. edwinii* colonies are enriched in  
314 reduced PCA relative to the phenazine producer, *P. fluorescens* (**Fig. 3D**), we hypothesized that a solution  
315 to this paradox might come from limiting oxygen by maintaining a reducing environment within the  
316 bacterial aggregates. We used oxygen and redox microelectrodes to test this hypothesis.

317 Because the co-colony bacterial aggregates are of a similar size as the width of our  
318 microelectrode tips (25 – 100  $\mu\text{m}$ ), puncture when probed, and are invisible from the outside of the co-  
319 colony, we instead grew *P. edwinii* next to the *Aspergillus* species with or without PCA to induce the  
320 sequestration phenotype and probed the interior of the bacterial colony (setup as in Fig. 4A). We  
321 measured the oxygen concentration and redox potential of the bacterial colony microenvironment after 48  
322 hours (**Fig. 5**). In the absence of PCA, *P. edwinii* grew as shallow, flat colonies with a narrow anoxic  
323 zone Fig. S4B). These colonies were anoxic at 50  $\mu\text{m}$  of depth before increasing in oxygen concentration  
324 at approximately 175  $\mu\text{m}$  depth (**Fig. 5A**). When grown without the fungal partner in the presence of  
325 PCA, the bacterial colony became taller and encased in an apparent layer of polysaccharide (**Fig. S4B**).  
326 Oxygen levels in this thicker colony dropped slowly through the outer layer, disappearing at  
327 approximately 180  $\mu\text{m}$ . Oxygen was again detected at 380  $\mu\text{m}$ , indicating a larger anoxic volume within  
328 the colony compared to the untreated colony. When grown next to its partner fungus in the presence of  
329 PCA, these trends continued with the colony again becoming taller and more dome shaped (**Fig. S4B**),  
330 becoming anoxic at 280  $\mu\text{m}$  beneath its thicker layer of matrix. At no depth probed was oxygen again  
331 detected.

332 Given the additional protection from PCA the  $\Delta hrcA$  mutant provides, we speculated that it might  
333 contain a larger anoxic core even in the absence of PCA challenge/its fungal partner. When grown alone  
334 in the absence of PCA,  $\Delta hrcA$  grew tall, rounded colonies (**Fig. S4B**) and reached anoxia 150  $\mu\text{m}$  from

335 the surface and continued to a depth of 590  $\mu\text{m}$  (**Fig. 5A**). In the presence of PCA, anoxia was reached at  
336 a depth of 250  $\mu\text{m}$  and continued to 660  $\mu\text{m}$ , which resulted in similarly large anoxic interiors even as  
337 PCA caused an increase in matrix material at the surface of the colony (**Fig. S4B**). Intriguingly, the  
338 presence of the fungus and treatment with PCA resulted in the  $\Delta hrcA$  mutant reaching anoxia at a similar  
339 depth as the PCA treatment alone at 230  $\mu\text{m}$ , but the oxygen concentration declined more sharply.  
340 Oxygen again could not be detected at any depth when the fungus was present (**Fig. 5A**).

341 Profiles using a redox probe revealed that, in the absence of PCA, neither WT nor  $\Delta hrcA$   
342 significantly lowered the redox potential through their depth, maintaining a potential of greater than 280  
343 mV in both cases, indicating an oxidizing environment. (**Fig. 5B**). This is not surprising because the  
344 absence of oxygen is necessary but not sufficient to create a reducing environment. When supplemented  
345 with PCA (the effective redox buffer), however, both strains showed a marked drop in redox potential to a  
346 low of approximately -30 mV, although the  $\Delta hrcA$  mutant maintained low redox potential over a greater  
347 depth and thus represents a larger volume of a reducing environment. When challenged with PCA in the  
348 presence of the fungus, both strains showed similar low redox potentials in their cores as when challenged  
349 with PCA alone, and the environment continued to be reducing at all tested depths for both strains. To  
350 determine if the *Aspergillus* species contributes to this reducing environment, the redox potential of  
351 fungal colonies was measured with and without PCA challenge. The fungus showed a sharp drop in redox  
352 potential when challenged with PCA (**Fig. S4C**). Although the drop was somewhat less than that  
353 produced by the bacterium, it is possible that the fungus helps maintain a reducing environment in  
354 partnership with *P. edwinii*.

355

### 356 **Fungal-induced pH shift corresponds with protection response**

357

358 While the *Aspergillus* species stimulated *P. edwinii* to generate anoxic and reducing interiors in  
359 the presence of PCA, the fungus was not required to trigger these bacterial responses. However, the  
360 *Aspergillus* species promoted an increase in PCA sequestration in both WT *P. edwinii* and even more so

361 in the  $\Delta hrcA$  strain (**Fig. 4E**), suggesting the fungus may provide a stress-related trigger to the bacterium.  
362 Many species of fungi will acidify their environment when stressed in an attempt to outcompete other  
363 microbes<sup>38</sup>. Accordingly, we hypothesized that our *Aspergillus* species might acidify the medium in  
364 response to PCA. In addition to the acid stress to which this would expose the bacterium, a lower pH  
365 results in a higher fraction of the PCA becoming protonated, and thus neutrally charged and more cell  
366 permeable, potentially forcing a response from *P. edwinii*. To test this hypothesis, we used a pH  
367 microelectrode to probe the pH of *P. edwinii* and *Aspergillus* colonies

368 Both the WT and the  $\Delta hrcA$  strain exhibited a colony pH profile above 7.0 when grown alone  
369 without PCA, with a slightly more acidic pH profile in the presence of PCA and an even more acidic  
370 profile in the presence of PCA + the fungus (**Fig. 5C**). Measurement of pH in fungal colonies alone  
371 showed that PCA exposure prompts the fungus to dramatically acidify its environment by 2-3 log units  
372 (**Fig. 5C**). Could acidification be a trigger for the protective response of *P. edwinii*? Given the dual stress  
373 induced by acidification in the presence of PCA and the involvement of a stress regulator in the activation  
374 of the protective PCA sequestration and reduction phenotype, we hypothesized that acidifying the  
375 medium could cause *P. edwinii* to behave as though its partner fungus is present even when absent.  
376 Indeed, HCl-acidified medium caused *P. edwinii* alone to sequester nearly four-fold more PCA, an action  
377 that previously required the fungal partner (**Fig. 5D**). We obtained similar results with citric acid, an  
378 organic acid made by some *Aspergillus* species and also commonly excreted from roots in the  
379 rhizosphere.

380

### 381 **Bacterial Protection of Fungi is not Specific to a Single Species Pairing**

382

383 To determine if mechanisms underpinning the protective partnership are general enough to allow  
384 other *Paraburkholderia* species to protect the *Aspergillus* isolate, we assayed the protective phenotype of  
385 three other *Paraburkholderia* species: *P. SOS3*, *P. unamae*, and *P. phenazinium*. *P. SOS3* was isolated in  
386 Australia and is genetically similar to *P. edwinii*; *P. unamae* was isolated from the corn roots in Mexico,

387 making it a bonafide member of a food crop rhizosphere<sup>39</sup>; and *P. phenazinium*, though inhibitory to our  
388 fungal isolate when grown in tandem, is another known rhizosphere member and has the ability to form  
389 nitrogen fixing nodules<sup>40,41</sup>. When challenged with 300  $\mu$ M PCA, both *P. SOS3* and *P. unamae* protected  
390 the *Aspergillus* isolate similar to *P. edwinii*, whereas *P. phenazinium* did not (**Fig. 6A**). If a pH shift helps  
391 prime the protective response, we similarly wondered whether *P. edwinii* may also protect other fungi,  
392 given that acidification is a general trait of filamentous fungi<sup>42,43</sup>. Accordingly, we tested the ability of *P.*  
393 *edwinii* to protect fungi from different niches, including a species of *Fusarium* isolated from infected corn  
394 seedling as well as clinical samples of the human opportunistic pathogens *Aspergillus fumigatus* and two  
395 *Penicillium* species isolated from the lungs of cystic fibrosis patients. While *A. fumigatus* is primarily  
396 thought of as a pathogen, many *Penicillium* species are thought to enhance plant growth while also being  
397 opportunistic humans pathogens. *P. edwinii* protected *Aspergillus fumigatus*, the *Fusarium* isolate, and  
398 one of the *Penicillium* isolates (**Fig. 6B**).

399         Together, these results suggest that the ability of bacteria to protect fungi from phenazine assault  
400 is not unique to *P. edwinii*. Moreover, the factors involved in activating the protection program are  
401 general enough to enable a diverse array of members of this genus to protect a fungus they may not  
402 necessarily be paired with in nature, at least under laboratory conditions. The apparent inclusivity of *P.*  
403 *edwinii* between more distantly related fungi but selectivity between members of the same genus (*e.g.*  
404 *Penicillium*) suggests that while the mechanism of protection may be general, there are more factors  
405 involved that may help determine the success of such pairings in nature.

406

## 407 **Discussion**

408         This study was motivated by an ecological paradox: how do vulnerable fungi withstand the  
409 toxicity of a widespread class of antibiotics (phenazines) produced by co-occurring bacteria in the soil?  
410 Given that soil microbial communities are diverse, we hypothesized that other bacteria in these niches  
411 would confer protection through inter-domain partnerships. Our discovery of *P. edwinii*—the “prosperous  
412 friend” that helps its fungal partner withstand PCA challenge—establishes that such beneficial



413 partnerships exist in nature and are likely common, a finding of basic interest that may also have  
414 important practical implications.

415         While much remains to be learned about the mechanisms underpinning the *P. edwinii-Aspergillus*  
416 partnership, our results underscore the importance of the biologically-controlled microenvironment and  
417 the biochemical conversation that generates it. *P. edwinii* effectively serves as a “toxin sponge”,  
418 sequestering PCA in a reducing environment in response to acidification driven by an *Aspergillus* species.  
419 The *P. edwinni* transcriptional repressor HrcA responds to the fungus, triggering the aggregation and PCA  
420 sequestration pathways. Yet we do not know how PCA is sequestered by *P. edwinii*—whether it is  
421 primarily stored extracellularly in the core of aggregates, or whether some fraction is held intracellularly.  
422 Similarly, whether specific enzymes are required to generate and maintain the reducing environment is  
423 unclear. A hint at an answer may be found in our mutagenic screen (Table S1): a transposon knockout of  
424 the E1 subunit of the pyruvate dehydrogenase gene generated a mutant that actively harms the fungus in a  
425 PCA dependent manner, with PCA crystals accumulating in the co-colony (**Fig. 4A**). Intriguingly,  
426 pyruvate dehydrogenase has previously been implicated in PCA reduction in *Pseudomonas aeruginosa*<sup>44</sup>.  
427 Future experiments will reveal how the absence of this enzyme promotes PCA toxicity, and whether WT  
428 *P. edwinni* can protect *Aspergillus* against redox-active small molecules other than PCA. That *P. edwinii*  
429 is genetically tractable and *Aspergillus* has the potential to be, makes this a good model system to explore  
430 these and other mechanistic questions.

431         Our focus in this study on the  $\Delta hrcA$  mutant derives from the fact that HcrA homologues are  
432 stress-inducible transcriptional repressors. For example, heat appears to inactivate HrcA in *B. subtilis*,  
433 releasing transcriptional repression of genes responsible for stress-tolerance<sup>30</sup>. An interesting possibility  
434 is that HcrA in *P. edwinii* regulates some of the genes involved in reducing and sequestering PCA in  
435 response to its fungal partner. If so, we speculate that HrcA degradation is not due to heat *per se*, but to  
436 redox stress from PCA as well as acid or other stress produced by the fungus, where the latter stress could  
437 increase the former. We also note that the  $\Delta hrcA$  mutant appears to have its protection program partially  
438 “activated” in the absence of these stressors, as the mutant will produce bacterial aggregates within the

439 fungus even without PCA present and will sequester more PCA than WT despite being apart from its  
440 fungal partner. That the  $\Delta hrcA$  mutant can sequester still more PCA with the fungus present suggests  
441 further regulators or triggers of the protection response await discovery.

442 An important question raised by our study is whether the phenomenon we have uncovered is  
443 environmentally relevant? We believe the answer is yes for several reasons. First, phenazine producers  
444 are widespread in nature <sup>6</sup> and thus odds are high that fungi will encounter them. Second, we were able to  
445 readily isolate a variety of such partnerships. Third, PCA challenge leads to fungal acidification. pH is  
446 well known to play a critical role in determining phenazine toxicity as PCA becomes neutrally charged  
447 when protonated ( $pK_a = 4.24$ ), leading it to more readily pass through cell membranes <sup>36,45</sup>. One study  
448 investigating the toxicity of PCA found that at a pH of 6.0, PCA showed virtually no toxicity to *C.*  
449 *elegans*, while at pH 5.0 toxicity was very high <sup>36</sup>. Therefore, while fungal acidification can kill  
450 competing microbes, it can also render natural antibiotics made by certain bacteria more toxic. We thus  
451 predict that a fungus cooperating with an acid-tolerant beneficial bacterial partner would have a fitness  
452 advantage in phenazine-replete microbial communities. Fourth and finally, members of the  
453 *Burkholderiaceae* family are known to be particularly acid tolerant, which underlies their ability to  
454 associate with fungi <sup>46</sup>. This, along with phenazine resistance among several individual species, make  
455 these bacteria ideal partners to provide protection from phenazine assault to organisms which produce  
456 acid in response to stress. Intriguingly, many plant roots also produce organic acid exudates that may  
457 reinforce such partnerships. Identifying which organic acids along with other stress signals protective  
458 bacteria sense and respond to will be necessary for better understanding and predicting the environmental  
459 relevance of these type of bacterial-fungal partnerships.

460 Given that PCA toxicity and production is predicted to increase in acidic soils that are vulnerable  
461 to climate-induced drought due to enhanced oxygen penetration <sup>8,47</sup>, finding biological agents that can  
462 protect fungi from phenazine toxicity may be relevant to agriculture. Many phenazine-sensitive  
463 filamentous fungi in the rhizosphere play important roles in water and nutrient acquisition for their host  
464 plants, and can help them withstand environmental stresses. Many *Paraburkholderia* species also have

465 been implicated in plant health, and the *P. unamae* isolate which we found to confer resistance to  
466 phenazines in this study was originally isolated from the roots of corn<sup>39</sup>. Understanding how often  
467 protective bacterial-fungal interactions occur in the rhizosphere may aid efforts to predict which microbial  
468 community compositions impact crop yield, differential stress tolerance of crops, and susceptibility to  
469 invasive pathogens. Additionally, though relatively little is known about phenazine interaction with the  
470 more deeply penetrating arbuscular mycorrhizal fungi that help support tree survival, a recent study  
471 suggests that phenazines could become toxic to this group of fungi if phenazine assault co-occurs with  
472 other environmental stresses<sup>48</sup>. Finally, soil and plant-associated fungi are known to play a key role in  
473 carbon sequestration, indicating that understanding how fungi can be included into phenazine replete  
474 environments matters not just for plant growth on a warmer Earth, but also for maximizing our natural  
475 reservoirs of sequestered carbon even as soil becomes less able to sequester carbon as global temperatures  
476 rise<sup>3,49</sup>.

477         Importantly, it is also possible that fungal-bacterial partnerships are exploited by fungal  
478 pathogens as well, as demonstrated by *P. edwinii* being capable of protecting a pathogenic *Fusarium*  
479 isolate in this study. One study showed that when *Paraburkholderia glathei* was paired with the fungal  
480 plant pathogens *Alternaria alternata* and *Fusarium solani*, *P. glathei* upregulated protein expression  
481 associated with antibiotic tolerance and oxidative stress response, while downregulating its starvation  
482 response<sup>50</sup>. These results raise the tantalizing possibility that this may be another example of a mutually  
483 beneficial interspecies interaction competent to resist phenazine assault, where the bacterial stress  
484 responses may serve to protect its partner fungus from other bacteria rather than defending itself from its  
485 fungal host. Whether similar dynamics can play out in the context of the human host is also worth  
486 exploring, given that pathogenic fungi such as *Aspergillus fumigatus* and *Candida albicans* can be co-  
487 isolated from the lungs of cystic fibrosis patients with *Pseudomonas aeruginosa*<sup>51,52</sup>. Lung function is  
488 negatively correlated with such coinfections, yet these fungi are largely inhibited by the phenazines  
489 produced by *P. aeruginosa*<sup>32,53</sup>. Whether protective bacterial partners might help resolve this paradox  
490 remains to be seen.

491           Given the ease with which we isolated our model *P. edwinii-Aspergillus* pairing and the relative  
492 promiscuity of the protective bacterial partner and/or fungus being protected, we posit that interspecies  
493 cooperation may be an important method by which fungal membership in microbial communities is  
494 determined. This insight has important implications for diverse problems concerning environmental and  
495 human health. We hope that the model system established in this study will enable basic biological  
496 insights to be gained that will facilitate such partnerships to be exploited for human benefit in the future.

497

498

## 499 **Materials and Methods**

500

### 501 **Strains and Media**

502 Strains used in this study are listed in Table S2. *E. coli* S17 was used for cloning and conjugation of the  
503 pMQ30 suicide vector during construction of deletion mutants. *E. coli* strain B2155 was used for mating  
504 of the mini-mariner containing pSC189. All *E. coli* were grown overnight in 5 mL lysogeny broth (LB),  
505 supplemented with 300  $\mu$ M diaminopimelic acid (DAP) for B2155. Strains were grown shaking at 250  
506 RPM at 37 °C for cloning constructs and 30 °C when used for conjugations. *Pseudomonas fluorescens* 2-  
507 79, *Pseudomonas chlororaphis*, *Pseudomonas chlororaphis* subsp. *aureofaciens* were grown overnight in  
508 5 ml LB at 30 °C shaking at 250 rpm. *Paraburkholderia phenazinium*, *Paraburkholderia unamae*,  
509 *Paraburkholderia SOS3*, and *Paraburkholderia edwinii* were grown 24 hours under the same conditions  
510 in 5 mL potato dextrose broth (PDB) unless otherwise indicated.

511 The environmental *Aspergillus* isolate was grown on potato dextrose agar (PDA) at 30 °C, and all  
512 experiments which paired *P. edwinii* and the *Aspergillus* isolate were grown for 48 hours unless otherwise  
513 indicated. Clinical *Aspergillus fumigatus* as well as *Penicillium* species isolates were obtained from  
514 Children's' Hospital Los Angeles, and were grown under the same conditions. Growth on PDA for 1  
515 week at 30 °C to allow conidiation was performed on all fungi to collect spores for storage and

516 experimentation. Fungal conidiospores were collected by scraping mature colonies with a pipette tip,  
517 filtering the spores through cheesecloth, and freezing in 15% glycerol. All PDA plates contained 1.75%  
518 agar, while all other plates contained 1.5% agar.

#### 519 **Co-isolation of phenazine tolerant fungal-bacterial pairings.**

520 100 mg of material was collected within the top 3 centimeters of top soil from outside of the Beckman  
521 Institute on the campus of the California Institute of Technology (34°8'21.15''N 118°7'36.05''W). The  
522 collected soil was washed in 0.1% TWEEN® 20 and pulsed in a sonicator bath for one minute to break up  
523 larger soil components. A serial dilution of the suspension was plated to extinction on potato dextrose  
524 medium. Fungal colonies were screened for adherent bacterial associates via amplification of the 16S  
525 rRNA encoding region of the bacterial genomes, and discovered pairings were subjected to challenge on  
526 potato dextrose agar supplemented with 300 µM phenazine-1-carboxylic acid. Surviving co-colonies were  
527 serially passaged in yeast-peptone (YP) medium to isolate the bacterium. The fungal partners were cured  
528 by growth on YP medium supplemented with 50 µg ml<sup>-1</sup> gentamicin, repatched onto PDA and grown for  
529 one week at 30 °C until conidiation. Spores were collected and frozen in 12.5% glycerol.

#### 530 **Phenazine Protection Assay**

531 *P. edwinii* was grown shaking overnight in potato dextrose broth at 30 °C. Cultures were normalized to  
532 OD<sub>600</sub> of 2.5, diluted 1:5, and mixed 1:1 with a suspension of ~ 4 x 10<sup>7</sup> spores collected from the  
533 *Aspergillus* species. 6 µl of this mixture was spotted onto potato dextrose plates supplemented with 300  
534 µM PCA and allowed to grow for 48 hours before measuring the co-colony diameter with the aid of  
535 Keyence digital microscope (VHX-600).

#### 536 **Mutant transposon screen of *P. edwinii*.**

537 Transposon mutagenesis of *P. edwinii* was achieved using a mini-mariner transposon housed in the  
538 pSC189 vector and mutants were generated as follows. *P. edwinii* was grown overnight in potato dextrose  
539 broth, and the pSC189 vector-containing B2155 strain of *E. coli* was grown in LB with 50 µg ml<sup>-1</sup>

540 kanamycin and supplemented with 300  $\mu\text{M}$  diaminopimelic acid (DAP). The *E. coli* was sub-cultured for  
541 3-4 h until early log phase was achieved. 1 mL of each culture was pelleted and washed in their respective  
542 media before being resuspended in 100  $\mu\text{l}$  of YP. The strains were mixed together and several 5  $\mu\text{l}$   
543 replicates were plated on YP plates overnight. Colonies were then scraped up and grown on YP plates  
544 lacking DAP and containing 30  $\mu\text{g ml}^{-1}$  kanamycin to select for transposon insertions. Colonies were  
545 picked after two days and grown overnight in a 96 well plate in YP containing 60  $\mu\text{g ml}^{-1}$  kanamycin.  
546 Mutants were mixed with spores of the *Aspergillus* species and grown on potato dextrose supplemented  
547 with PCA as above to screen for a dysregulated protection response. Mutants of interest had their  
548 transposition insertion mapped using arbitrary PCR.

#### 549 **Construction of in-frame deletion and complementation strains in *P. edwinii*.**

550 In-frame deletions were constructed in *P. edwinii* using homologous recombination as previously  
551 described in *Pseudomonas* species with modification<sup>54</sup>. ~1 KB regions upstream and downstream of the  
552 genomic region to be deleted were cloned into the pMQ30 suicide vector at the *Sma*I site, and the  
553 resulting constructs were electroporated into the S17 *E. coli* strain. Matings were conducted as described  
554 above, and the resulting mated colonies were scraped up and plated on potato dextrose containing 50  $\mu\text{g}$   
555  $\text{ml}^{-1}$  gentamycin and 15  $\mu\text{g ml}^{-1}$  chloramphenicol. Colonies were restreaked on selective plates, and  
556 finally patched onto YP plates amended with 7.5% (w/v) sucrose. Candidate colonies grown after 48 h  
557 were screened by polymerase chain reaction to identify those containing the desired in-frame deletions.

558 The pBBR1MCS-2 expression plasmid was used for complementation experiments. The gene of interest  
559 plus a 24 bp region upstream of the start codon were cloned into the plasmid and electroporated into *P.*  
560 *edwinii* using the following protocol. *P. edwinii* was grown overnight in potato dextrose broth. 4-5 mL of  
561 the culture was spun down and washed twice with 20% (w/v) sucrose at room temperature, before  
562 resuspending it in 100  $\mu\text{l}$  of 20% (w/v) sucrose. 100 ng of the plasmid was added to 50  $\mu\text{L}$  of the  
563 resuspended culture and electroporated using standard *E. coli* settings. Cells were allowed to recover for 2  
564 h in YP at 30  $^{\circ}\text{C}$  before plating to YP plates containing 30  $\mu\text{g ml}^{-1}$  kanamycin. Colonies were grown

565 shaking overnight in potato dextrose broth with 60  $\mu\text{g ml}^{-1}$  kanamycin before being used in growth assays  
566 without antibiotic selection as described above.

#### 567 **Biofilm assay**

568 V8 medium was produced by diluting V8 tomato juice 1:5 with ddH<sub>2</sub>O the same day of the experiment.  
569 Overnight *P. edwinii* cultures grown in potato dextrose broth were normalized to an OD<sub>600</sub> of 2.5 and  
570 diluted 1:67 in the V8 medium and vortexed. 100  $\mu\text{L}$  was pipetted per well into 96 well microtiter dishes  
571 as described for other systems<sup>31</sup>. Biofilms were stored in a humidified microchamber and allowed to  
572 grow for 24 hours at 30 °C before being stained with 0.1% crystal violet for 20 minutes, and rinsed twice  
573 with ddH<sub>2</sub>O.

#### 574 **Motility assay**

575 *P. edwinii* strains were tested for motility using a swim assay. A modified M9 medium lacking added  
576 NaCl was made using 0.35% agar. Strains of *P. edwinii* were normalized to an OD<sub>600</sub> of 2.5 and 100  $\mu\text{L}$   
577 was pipetted into a 96 well microtiter dish. A p10 pipette tip was dipped into one of these wells and  
578 subsequently plunged into the swim agar. Plates were incubated at 30 °C for 72 h.

#### 579 **Phenazine sequestration assay**

580 5  $\mu\text{l}$  each of a spore suspension from the *Aspergillus* species and an overnight culture of *P. edwinii*  
581 normalized to OD<sub>600</sub> 2.5 were spotted 5  $\mu\text{l}$  apart from each other on potato dextrose agar supplemented  
582 with 300  $\mu\text{M}$  PCA and grown until the *P. edwinii* colonies developed a distinct yellow hue, approximately  
583 48 h. Material from the *P. edwinii* colonies was then collected and resuspended in 250  $\mu\text{L}$  Phosphate  
584 buffer saline solution (PBS). The samples were centrifuged and the supernatant was read for absorbance  
585 at 365 nm in a spectrophotometer and compared to a standard curve to derive PCA concentration. The  
586 pelleted fraction of the sample was dried and weighed to normalize sequestered PCA to bacterial dry  
587 weight mass.

588 This procedure was repeated to determine the fraction of reduced PCA present, but samples were  
589 collected and analyzed in an anaerobic chamber, and the reduced PCA was identified using an excitation of  
590 365 nm and read at an emission of 528 nm on a BioTek plate reader. Concentration was calculated using a  
591 standard curve of reduced PCA and compared to the total PCA concentration to determine the reduced  
592 fraction.

### 593 **PCA Degradation Assay**

594 *P. edwinii* was added to 5 ml of PDB that was spiked with 300  $\mu$ M PCA. For combined bacterial-fungal  
595 samples, the *Aspergillus* isolate was pre-grown in the medium for 3 days to allow an appreciable amount  
596 of slower growing fungal biomass to coexist with the subsequently added *P. edwinii* and PCA. 250  $\mu$ l was  
597 sampled every 24 hours for 3 days, and all cultures had reached stationary phase by the first sampling.  
598 Cells were pelleted, and the supernatant was used to quantify PCA by absorbance at 365 nm compared to  
599 a standard curve and PCA negative control.

### 600 **Microelectrode Profiling**

601 *Aspergillus* and *P. edwinii* colonies were grown side by side or alone on PDA as above for 48 h at 30  $^{\circ}$ C.  
602 Unisense pH and redox 25  $\mu$ m tip microelectrodes were paired with a steel reference probe (Unisense) in  
603 accordance with the manufacturer's instructions for use and calibration, and were readthrough a high-  
604 impedance millivoltmeter-equipped multimeter, while a 10  $\mu$ m tip O<sub>2</sub> probe was read through the  
605 multimeter's picoampere amplifier. Oxygen concentration was read at 10  $\mu$ m interval depths within the  
606 colonies, while pH and redox values were read at 25  $\mu$ m intervals through the colonies. Redox values are  
607 given relative to a standard hydrogen electrode. Initial calibration and recording of data were performed  
608 using the Unisense SensorTrace Suite software. All calibrations and measurements were conducted at 23  
609  $^{\circ}$ C.

### 610 **MiPACT clearing and HCR**



611 Fungal tissue was cleared using the MiPACT procedure as described previously with minor modification  
612 <sup>28</sup>. Briefly, samples were grown for 48 h, and whole co-colonies cut from their growth medium, removing  
613 as much agar as possible. Samples were incubated at 4 °C overnight in 3% (v/v) paraformaldehyde.  
614 Samples were cleared for 2 weeks in a spinning 8% (w/v) SDS solution at 37 °C. Samples were washed in  
615 PBS, treated with 1 mg ml<sup>-1</sup> lysozyme for 30 minutes at 30 °C before being hybridized with HCR 2.0  
616 eubacterial probes and incubated overnight at 46 °C while gently shaking. Samples were washed and the  
617 amplification step was performed using hairpins tagged with an alexa 647 fluorophore for visualization.  
618 Samples were stained with 1 µg ml<sup>-1</sup> DAPI, and microscopy was performed on an inverted confocal Leica  
619 model TCS SPE confocal microscope with a 10x objective for the colony center and edge, and a Nikon  
620 Ti2 Eclipse widefield microscope with a 4x objective for images of the colony ridge. Contrast of the HCR  
621 generated images were normalized to the brightest signal in like samples (i.e. colony edge vs edge, center  
622 vs center). Contrast was adjusted independently for each DAPI stained images for clarity of fungal  
623 morphology present near the bacteria.

#### 624 **CFU Quantification**

625 Fungal-bacterial co-colonies were grown as above, and the colonies were homogenized using a tissue  
626 homogenizer (Bio-Gen Pro200) at 60% power for one minute. The resulting slurry was serially diluted  
627 and plated to YP medium supplemented with 50 µg ml<sup>-1</sup> nystatin to prevent fungal growth. Bacterial  
628 colonies were grown for 48 h and counted.

#### 629 **HPLC-MS**

630 *P. edwinii* colonies were scraped from their growth plates and resuspended in phosphate buffer saline  
631 before being pelleted. Supernatants were frozen and thawed to encourage precipitation of large particulate  
632 condiments, and centrifuged using a cellulose acetate Spin-X column (VWR). 20 µl of the supernatant  
633 was injected onto a Waters e2695 Separations Module equipped with a 2998 PDA Detector and run  
634 through a C18 column (XBridge, 3.5 µm, 2.1 x 50 mm) housed at 40 °C at a flow rate of 0.5 ml min<sup>-1</sup> for

635 20 mins. The mobile phase consisted of ddH<sub>2</sub>O + 0.04% (v/v) NH<sub>4</sub>OH with a gradient to 70% (v/v)  
636 acetonitrile + 0.04% (v/v) NH<sub>4</sub>OH with a constant background of 2% (v/v) methanol and compared  
637 against a prepared standard. The identify of PCA was confirmed using a quadrupole Time of Flight MS  
638 (Q-TOF, Xevo G2-XS, Waters) targeting a mass of 224.2 m/z.

### 639 **Genomic Sequencing and Annotation**

640 *P. edwinii* genomic DNA was recovered using the Qiagen plant and tissue kit on 1 mL of culture grown  
641 overnight in PDB. Genomic DNA from the *Aspergillus* species was recovered by growing it for 72 h in  
642 PDB until large fungal aggregates had formed. These aggregates were frozen in liquid nitrogen, and  
643 crushed with a mortar and pestle followed by a chloroform extraction.

644 Illumina sequencing of both genomes was conducted at the Caltech genomic core facility, and subsequent  
645 PACBio sequencing was carried out at the UC Irvine Genomics High Throughput Facility. Genome  
646 assembly was performed using SPAdes version 3.12.0, and BASys was used for genome annotation of *P.*  
647 *edwinii* as provided by the Health Sciences Library System at the University of Pittsburg.

648

### 649 **Acknowledgements**

650 We thank members of the Newman lab for constructive feedback on the project and the manuscript, and  
651 The Millard and Muriel Jacobs Genetics and Genomics Laboratory at Caltech and Igor Antoshechkin for  
652 support during library preparation and sequencing. We thank Marko Kojic for help screening transposon  
653 mutants, as well as Robert Cramer, Deborah Hogan, and Jeff Holloman for sharing their expertise in  
654 mycology. This work was supported by the Life Sciences Research Foundation (postdoctoral fellowship  
655 to K.M.D.), the Resnick Institute (K.M.D. and D.K.N.) and the NIH (1R01AI127850- 01A1 to D.K.N.).

656

657

658 **References**

- 659 1. Delfino, E., Del Puente, F., Briano, F., Sepulcri, C., and Giacobbe, D.R. (2019). Respiratory Fungal  
660 Diseases in Adult Patients With Cystic Fibrosis. *Clin Med Insights Circ Respir Pulm Med* 13.
- 661 2. Jahagirdar, S., Kambrekar, D.N., Navi, S.S., and Kunta, M. (2019). Plant Growth-Promoting Fungi:  
662 Diversity and Classification. In *Bioactive Molecules in Plant Defense: Signaling in Growth and Stress*,  
663 S. Jogaiah and M. Abdelrahman, eds. (Springer International Publishing), pp. 25–34.
- 664 3. Soudzilovskaia, N.A., van Bodegom, P.M., Terrer, C., Zelfde, M. van't, McCallum, I., Luke  
665 McCormack, M., Fisher, J.B., Brundrett, M.C., de Sá, N.C., and Tedersoo, L. (2019). Global  
666 mycorrhizal plant distribution linked to terrestrial carbon stocks. *Nature Communications* 10, 5077.
- 667 4. Chin, T., Bloemberg, G., Bij, A., Drift, K., Schripsema, J., Kroon, B., Scheffer, R., Keel, C., Bakker, P.,  
668 Tichy, H.-V., et al. (1998). Biocontrol by Phenazine-1-carboxamide-Producing *Pseudomonas*  
669 *chlororaphis* PCL1391 of Tomato Root Rot Caused by *Fusarium oxysporum* f. sp. *radicis-lycopersici*.  
670 *Mol Plant Microbe Interact* 11, 1069–1077.
- 671 5. Thomashow, L.S., and Weller, D.M. (1988). Role of a phenazine antibiotic from *Pseudomonas*  
672 *fluorescens* in biological control of *Gaeumannomyces graminis* var. *tritici*. *J Bacteriol* 170, 3499–  
673 3508.
- 674 6. Dar, D., Thomashow, L.S., Weller, D.M., and Newman, D.K. (2020). Global landscape of phenazine  
675 biosynthesis and biodegradation reveals species-specific colonization patterns in agricultural soils  
676 and crop microbiomes. *eLife* 9, e59726.
- 677 7. Mavrodi, O.V., Mavrodi, D.V., Parejko, J.A., Thomashow, L.S., and Weller, D.M. (2012). Irrigation  
678 Differentially Impacts Populations of Indigenous Antibiotic-Producing *Pseudomonas* spp. in the  
679 Rhizosphere of Wheat. *Appl. Environ. Microbiol.* 78, 3214–3220.
- 680 8. Mavrodi, D.V., Mavrodi, O.V., Elbourne, L.D.H., Tetu, S., Bonsall, R.F., Parejko, J., Yang, M., Paulsen,  
681 I.T., Weller, D.M., and Thomashow, L.S. (2018). Long-Term Irrigation Affects the Dynamics and  
682 Activity of the Wheat Rhizosphere Microbiome. *Front Plant Sci* 9.
- 683 9. Trejo-Hernández, A., Andrade-Domínguez, A., Hernández, M., and Encarnación, S. (2014).  
684 Interspecies competition triggers virulence and mutability in *Candida albicans* – *Pseudomonas*  
685 *aeruginosa* mixed biofilms. *The ISME Journal* 8, 1974–1988.
- 686 10. Sass, G., Ansari, S.R., Dietl, A.-M., Déziel, E., Haas, H., and Stevens, D.A. (2019). Intermicrobial  
687 interaction: *Aspergillus fumigatus* siderophores protect against competition by *Pseudomonas*  
688 *aeruginosa*. *PLOS ONE* 14, e0216085.
- 689 11. Pan, S.K., and Das, A. (2010). In Vivo Interaction in Antagonistic Potential of *Trichoderma* spp. and  
690 *Pseudomonas fluorescens*. *Journal of Biological Control* 24, 263–267.
- 691 12. Patel, N.P., Raju, M., Haldar, S., and Chatterjee, P.B. (2020). Characterization of phenazine-1-  
692 carboxylic acid by *Klebsiella* sp. NP-C49 from the coral environment in Gulf of Kutch, India. *Arch*  
693 *Microbiol* 202, 351–359.

- 694 13. Amin, R., Dupuis, A., Aaron, S.D., and Ratjen, F. (2010). The effect of chronic infection with  
695 *Aspergillus fumigatus* on lung function and hospitalization in patients with cystic fibrosis. *Chest* 137,  
696 171–176.
- 697 14. Bonfante, P., and Genre, A. (2010). Mechanisms underlying beneficial plant–fungus interactions in  
698 mycorrhizal symbiosis. *Nature Communications* 1, 48.
- 699 15. Marjanović, Ž., and Nehls, U. (2008). Ectomycorrhiza and Water Transport. In *Mycorrhiza: State of*  
700 *the Art, Genetics and Molecular Biology, Eco-Function, Biotechnology, Eco-Physiology, Structure and*  
701 *Systematics*, A. Varma, ed. (Springer), pp. 149–159.
- 702 16. Varsha, K.K., Nishant, G., Sneha, S.M., Shilpa, G., Devendra, L., Priya, S., and Nampoothiri, K.M.  
703 (2016). Antifungal, Anticancer and Aminopeptidase Inhibitory Potential of a Phenazine Compound  
704 Produced by *Lactococcus* BSN307. *Indian J Microbiol* 56, 411–416.
- 705 17. Fisher, M.C., Henk, D.A., Briggs, C.J., Brownstein, J.S., Madoff, L.C., McCraw, S.L., and Gurr, S.J.  
706 (2012). Emerging fungal threats to animal, plant and ecosystem health. *Nature* 484, 186–194.
- 707 18. Perry, E.K., and Newman, D.K. (2019). The transcription factors ActR and SoxR differentially affect  
708 the phenazine tolerance of *Agrobacterium tumefaciens*. *Molecular Microbiology* 112, 199–218.
- 709 19. Costa, K.C., Bergkessel, M., Saunders, S., Korlach, J., and Newman, D.K. (2015). Enzymatic  
710 Degradation of Phenazines Can Generate Energy and Protect Sensitive Organisms from Toxicity.  
711 *mBio* 6.
- 712 20. Yang, Z.-J., Wang, W., Jin, Y., Hu, H.-B., Zhang, X.-H., and Xu, Y.-Q. (2007). Isolation, Identification,  
713 and Degradation Characteristics of Phenazine-1-Carboxylic Acid–Degrading Strain *Sphingomonas* sp.  
714 DP58. *Curr Microbiol* 55, 284–287.
- 715 21. Nazir, R., Tazetdinova, D.I., and Elsas, J.D. van (2014). *Burkholderia terrae* BS001 migrates  
716 proficiently with diverse fungal hosts through soil and provides protection from antifungal agents.  
717 *Frontiers in Microbiology* 5, undefined-undefined.
- 718 22. Partida-Martinez, L.P., and Hertweck, C. (2005). Pathogenic fungus harbours endosymbiotic bacteria  
719 for toxin production. *Nature* 437, 884–888.
- 720 23. Seigle-Murandi, F., Guiraud, P., Croize, J., Falsen, E., and Eriksson, K.L. (1996). Bacteria Are  
721 Omnipresent on *Phanerochaete chrysosporium* Burdsall. *Applied and environmental microbiology*  
722 62, 2477–2481.
- 723 24. Bahram, M., Hildebrand, F., Forslund, S.K., Anderson, J.L., Soudzilovskaia, N.A., Bodegom, P.M.,  
724 Bengtsson-Palme, J., Anslan, S., Coelho, L.P., Harend, H., et al. (2018). Structure and function of the  
725 global topsoil microbiome. *Nature* 560, 233–237.
- 726 25. Levy, A., Merritt, A.J., Mayo, M.J., Chang, B.J., Abbott, L.K., and Inglis, T.J.J. (2009). Association  
727 between *Burkholderia* species and arbuscular mycorrhizal fungus spores in soil. *Soil Biology and*  
728 *Biochemistry* 41, 1757–1759.

- 729 26. Simionato, A.S., Navarro, M.O.P., de Jesus, M.L.A., Barazetti, A.R., da Silva, C.S., Simões, G.C., Balbi-  
730 Peña, M.I., de Mello, J.C.P., Panagio, L.A., de Almeida, R.S.C., et al. (2017). The Effect of Phenazine-  
731 1-Carboxylic Acid on Mycelial Growth of *Botrytis cinerea* Produced by *Pseudomonas aeruginosa* LV  
732 Strain. *Front Microbiol* 8.
- 733 27. Mavrodi, D.V., Ksenzenko, V.N., Bonsall, R.F., Cook, R.J., Boronin, A.M., and Thomashow, L.S. (1998).  
734 A Seven-Gene Locus for Synthesis of Phenazine-1-Carboxylic Acid by *Pseudomonas fluorescens* 2-79.  
735 *J Bacteriol* 180, 2541–2548.
- 736 28. DePas, W.H., Starwalt-Lee, R., Sambeek, L.V., Kumar, S.R., Gradinaru, V., and Newman, D.K. (2016).  
737 Exposing the Three-Dimensional Biogeography and Metabolic States of Pathogens in Cystic Fibrosis  
738 Sputum via Hydrogel Embedding, Clearing, and rRNA Labeling. *mBio* 7.
- 739 29. Chiang, S.L., and Rubin, E.J. (2002). Construction of a mariner-based transposon for epitope-tagging  
740 and genomic targeting. *Gene* 296, 179–185.
- 741 30. Schulz, A., and Schumann, W. (1996). *hrcA*, the first gene of the *Bacillus subtilis* *dnaK* operon  
742 encodes a negative regulator of class I heat shock genes. *J Bacteriol* 178, 1088–1093.
- 743 31. O’Toole, G.A., and Kolter, R. (1998). Initiation of biofilm formation in *Pseudomonas fluorescens*  
744 WCS365 proceeds via multiple, convergent signalling pathways: a genetic analysis. *Molecular*  
745 *Microbiology* 28, 449–461.
- 746 32. Morales, D.K., Grahl, N., Okegbe, C., Dietrich, L.E.P., Jacobs, N.J., and Hogan, D.A. (2013). Control of  
747 *Candida albicans* Metabolism and Biofilm Formation by *Pseudomonas aeruginosa* Phenazines. *mBio*  
748 4, e00526-12.
- 749 33. Rada, B., and Leto, T.L. (2013). Pyocyanin effects on respiratory epithelium: relevance in  
750 *Pseudomonas aeruginosa* airway infections. *Trends Microbiol* 21, 73–81.
- 751 34. Allen, L., Dockrell, D.H., Pattery, T., Lee, D.G., Cornelis, P., Hellewell, P.G., and Whyte, M.K.B. (2005).  
752 Pyocyanin production by *Pseudomonas aeruginosa* induces neutrophil apoptosis and impairs  
753 neutrophil-mediated host defenses in vivo. *J Immunol* 174, 3643–3649.
- 754 35. Zhu, X., Zeng, Y., Zhao, X., Zou, S., He, Y.-W., and Liang, Y. (2017). A genetic screen in combination  
755 with biochemical analysis in *Saccharomyces cerevisiae* indicates that phenazine-1-carboxylic acid is  
756 harmful to vesicular trafficking and autophagy. *Scientific Reports* 7, 1967.
- 757 36. Cezairliyan, B., Vinayavekhin, N., Grenfell-Lee, D., Yuen, G., Saghatelian, A., and Ausubel, F. (2013).  
758 Identification of *Pseudomonas aeruginosa* Phenazines that Kill *Caenorhabditis elegans*. *PLoS*  
759 *pathogens* 9, e1003101.
- 760 37. Zhang, L., Tian, X., Kuang, S., Liu, G., Zhang, C., and Sun, C. (2017). Antagonistic Activity and Mode of  
761 Action of Phenazine-1-Carboxylic Acid, Produced by Marine Bacterium *Pseudomonas aeruginosa*  
762 PA31x, Against *Vibrio anguillarum* In vitro and in a Zebrafish In vivo Model. *Front Microbiol* 8.
- 763 38. Liaud, N., Giniés, C., Navarro, D., Fabre, N., Crapart, S., Gimbert, I.H.-, Levasseur, A., Raouche, S., and  
764 Sigoillot, J.-C. (2014). Exploring fungal biodiversity: organic acid production by 66 strains of  
765 filamentous fungi. *Fungal Biology and Biotechnology* 1, 1.

- 766 39. Caballero-Mellado, J., Martínez-Aguilar, L., Paredes-Valdez, G., and Estrada-de los Santos, P. (2004).  
767 *Burkholderia unamae* sp. nov., an N<sub>2</sub>-fixing rhizospheric and endophytic species. International  
768 journal of systematic and evolutionary microbiology *54*, 1165–72.
- 769 40. Dias, G.M., Pires, A. de S., Grilo, V.S., Castro, M.R., Vilela, L. de F., and Neves, B.C. (2019).  
770 Comparative genomics of *Paraburkholderia kururiensis* and its potential in bioremediation,  
771 biofertilization, and biocontrol of plant pathogens. MicrobiologyOpen *8*, e00801.
- 772 41. Viillard, V., Poirier, I., Cournoyer, B., Haurat, J., Wiebkin, S., Ophel-Keller, K., and Balandreau, J.  
773 (1998). *Burkholderia graminis* sp. nov., a rhizospheric *Burkholderia* species, and reassessment of  
774 [*Pseudomonas*] *phenazinium*, [*Pseudomonas*] *pyrrocinia* and [*Pseudomonas*] *glathei* as *Burkholderia*.  
775 International Journal of Systematic and Evolutionary Microbiology, *48*, 549–563.
- 776 42. Tkacz, J.S., and Lange, L. eds. (2004). Advances in Fungal Biotechnology for Industry, Agriculture, and  
777 Medicine (Springer US).
- 778 43. Andersen, M.R., Lehmann, L., and Nielsen, J. (2009). Systemic analysis of the response of *Aspergillus*  
779 *niger* to ambient pH. Genome Biol *10*, R47.
- 780 44. Glasser, N.R., Wang, B.X., Hoy, J.A., and Newman, D.K. (2017). The Pyruvate and  $\alpha$ -Ketoglutarate  
781 Dehydrogenase Complexes of *Pseudomonas aeruginosa* Catalyze Pyocyanin and Phenazine-1-  
782 carboxylic Acid Reduction via the Subunit Dihydrolipoamide Dehydrogenase \*. Journal of Biological  
783 Chemistry *292*, 5593–5607.
- 784 45. Brisbane, P.G., Janik, L.J., Tate, M.E., and Warren, R.F. (1987). Revised structure for the phenazine  
785 antibiotic from *Pseudomonas fluorescens* 2-79 (NRRL B-15132). Antimicrob Agents Chemother *31*,  
786 1967–1971.
- 787 46. Stopnisek, N., Bodenhausen, N., Frey, B., Fierer, N., Eberl, L., and Weiskopf, L. (2014). Genus-wide  
788 acid tolerance accounts for the biogeographical distribution of soil *Burkholderia* populations.  
789 Environ Microbiol *16*, 1503–1512.
- 790 47. Mavrodi, D.V., Mavrodi, O.V., Parejko, J.A., Bonsall, R.F., Kwak, Y.-S., Paulitz, T.C., Thomashow, L.S.,  
791 and Weller, D.M. (2012). Accumulation of the Antibiotic Phenazine-1-Carboxylic Acid in the  
792 Rhizosphere of Dryland Cereals. Appl. Environ. Microbiol. *78*, 804–812.
- 793 48. Dwivedi, D., Johri, B.N., Ineichen, K., Wray, V., and Wiemken, A. (2009). Impact of antifungals  
794 producing rhizobacteria on the performance of *Vigna radiata* in the presence of arbuscular  
795 mycorrhizal fungi. Mycorrhiza *19*, 559–570.
- 796 49. Varney, R.M., Chadburn, S.E., Friedlingstein, P., Burke, E.J., Koven, C.D., Hugelius, G., and Cox, P.M.  
797 (2020). A spatial emergent constraint on the sensitivity of soil carbon turnover to global warming.  
798 Nature Communications *11*, 5544.
- 799 50. Stopnisek, N., Zühlke, D., Carlier, A., Barberán, A., Fierer, N., Becher, D., Riedel, K., Eberl, L., and  
800 Weiskopf, L. (2016). Molecular mechanisms underlying the close association between soil  
801 *Burkholderia* and fungi. ISME J *10*, 253–264.

- 802 51. Al-momani, H., Perry, A., Stewart, C.J., Jones, R., Krishnan, A., Robertson, A.G., Bourke, S., Doe, S.,  
803 Cummings, S.P., Anderson, A., et al. (2016). Microbiological profiles of sputum and gastric juice  
804 aspirates in Cystic Fibrosis patients. *Scientific Reports* 6, 26985.
- 805 52. Peleg, A., Hogan, D., and Mylonakis, E. (2010). Medically important bacterial-fungal interactions.  
806 *Nature reviews. Microbiology* 8, 340–9.
- 807 53. Briard, B., Bomme, P., Lechner, B.E., Mislin, G.L.A., Lair, V., Prévost, M.-C., Latgé, J.-P., Haas, H., and  
808 Beauvais, A. (2015). *Pseudomonas aeruginosa* manipulates redox and iron homeostasis of its  
809 microbiota partner *Aspergillus fumigatus* via phenazines. *Sci Rep* 5, 8220.
- 810 54. Shanks, R.M.Q., Caiazza, N.C., Hinsa, S.M., Toutain, C.M., and O’Toole, G.A. (2006). *Saccharomyces*  
811 *cerevisiae*-Based Molecular Tool Kit for Manipulation of Genes from Gram-Negative Bacteria. *Appl*  
812 *Environ Microbiol* 72, 5027–5036.

813

814

815

816 **Figure Legends**

817

818 **Fig. 1. Co-isolation of a fungus and protective bacterial partner.** A) 100 mg of top soil samples were  
819 washed in PBS with 0.01% Tween 20, sonicated to break apart soil and loosely associated microbes, and  
820 plated on PDA. Colonies were screened for bacterial partners by 16S amplification, and pairings were  
821 subsequently cured of their partners and tested by PCA challenge. **B)** An *Aspergillus* isolate from the soil  
822 growing on PDA (column, top). The same isolate fails to grow in the presence of 300  $\mu$ M PCA after 48  
823 hours (column, center), but is capable of withstanding phenazine assault when grown with its co-isolated  
824 partner, *P. edwinii* (column, bottom). When *P. edwinii* is grown alone next to *P. fluorescens*, it can be  
825 engulfed by the phenazine-producing strain (bottom row, left) but not the phenazine mutant strain, *::phzD*  
826 (bottom row, right). **C)** The isolated *Aspergillus* species is inhibited by a wide array of phenazine  
827 producing organisms (left column), The bacterial competitors and primary phenazines they produce, top  
828 to bottom, are *Pseudomonas chlororaphis* (phenazine-1-carboxamide), *Pseudomonas aureofaciens* (2-  
829 hydroxyphenazine), *Pseudomonas fluorescens* (PCA), and *Paraburkholderia phenazinium* (iodinin).  
830 Fungal growth is enhanced in the same conditions by the presence of *P. edwinii* (right column). Also note  
831 *P. fluorescens* is incapable of engulfing the co-colony as it did to *P. edwinii* alone in B. Bacterial  
832 aggregates are visible in several images. All colonies were grown on PDA for 48 hrs at 30 °C.

833 **Fig. 2. *P. edwinii* forms aggregates in center of fungal colony in response to PCA challenge.** Bacteria  
834 gather along the edge of the mycelia (left column) and mixed throughout the interior of the fungal colony  
835 (right center column). When challenged with PCA, *P. edwinii* forms congregates less at the leading edge  
836 of the mycelium (left center column) but aggregates within the colony center (right column). Whole  
837 colonies were grown on PDA for 48 hours at 30 °C, processed using the MiPACT technique to render  
838 fungal tissue transparent, and visualized using HCR eubacterial probes and DAPI (see materials and  
839 methods). Eubacterial probes were labeled with a with an Alexa 647 fluorophore. Images are  
840 representative of three independently grown co-colonies for each condition, and were captured on an  
841 inverted confocal Leica model TCS SPE confocal microscope with a 10x objective. Images of the HCR  
842 signal were normalized in contrast to the brightest image in like samples (i.e. edge vs edge, or center vs  
843 center), while images of the DAPI signal were independently adjusted to best outline fungal morphology  
844 in the vicinity of the bacteria.

845 **Fig. 3. *P. edwinii* acts as a toxin sponge.** A) The *Aspergillus* species and *P. edwinii* growing on PDA  
846 supplemented with 300  $\mu$ M PCA growing at a distance (top) and 5 mm apart (bottom). Note the  
847 *Aspergillus* growth toward the bacterium and deepening yellow color of *P. edwinii* when the two  
848 organisms are grown in proximity of one another. Images are representative of 5 sets of colonies. **B)**  
849 HPLC chromatogram with the peak representing PCA derived from scraped up *P. edwinii* colonies grown  
850 with or without its fungal partner, and in the presence of absence of PCA challenge. **C)** nmoles PCA  
851 sequestered by *P. edwinii* in the absence and presence of its partner fungus, normalized by bacterial dry  
852 mass. Quantification was performed by measuring absorbance at 365 nm. Error bars represent standard  
853 deviation of four biological replicates. \*\*\*  $p < 0.001$ . **D)** Fraction of reduced PCA present (left) in a *P.*  
854 *edwinii* or *Pseudomonas fluorescens* colony when grown as a three-member system with the isolated  
855 *Aspergillus* species (right). Reduced PCA was quantified by fluorescence spectroscopy using an  
856 excitation wavelength of 365 nm and reading emission at 520 nm. Error bars represent standard deviation  
857 of 3 biological replicates.

858 **Fig. 4. *hrcA* regulates the protection response of *P. edwinii*.** A) Transposon mutants of *P. edwinii* that  
859 alter the fungal protection response when grown for 48 hours on PDA supplemented with 300  $\mu$ M of



860 PCA, organized from less bacterial aggregation/protection to most. **B)** An in-frame deletion of the *hrcA*  
861 gene was constructed to verify the transposon phenotype, and was complemented using the pBBR1  
862 expression vector. **C)**  $\Delta hrcA$  shows a greater degree of fungal protection compared to the WT strain.  
863 Error bars represent standard deviation of four biological replicates. \*\*\* $p < 0.001$ . **D)** Comparison of WT  
864 and  $\Delta hrcA$  CFUs derived from co-colonies. Whole co-colonies exposed or not exposed to PCA challenge  
865 were excised from PDA plates, homogenized, and plated on PDA supplemented with nystatin to prevent  
866 fungal growth. Reported is the total number of CFUs per co-colony. Error bars represent standard  
867 deviation of four biological replicates. \* $p < 0.05$ , \*\* $p < 0.01$ . **E)** Comparison of the ability of WT and  
868  $\Delta hrcA$  to sequester PCA with and without partner fungus. Error bars represent standard deviation of four  
869 biological replicates. \* $p < 0.05$ . **F)** Biofilm and motility assay of WT and  $\Delta hrcA$ . The WT strain shows  
870 increased biofilm formation and motility (top images) compared to  $\Delta hrcA$  (bottom images). The biofilm  
871 formation assay utilized 1/5 V8 medium and was grown for 24 hours at 30 °C before staining with 0.1%  
872 crystal violet, while the motility assay was conducted in modified M9 medium for 72 hours at 30 °C.  
873 Error bars represent standard deviation of four biological replicates. \*\*\* $p < 0.001$ .

874 **Fig. 5. *P. edwinii* and *Aspergillus* species respond to PCA challenge by modifying oxygen**  
875 **availability, reduction potential, and pH. A)** Oxygen profile of *P. edwinii* colonies. The WT colony  
876 grows as a flat disc in the absence of PCA, but becomes rounded with an apparent outer polysaccharide  
877 layer when stressed with PCA, and the increase in colony volume creates a larger anoxic zone beneath  
878 this layer than exists in the non-stress condition (left).  $\Delta hrcA$  shows a similar trend but more closely  
879 resembles the WT PCA (+) condition even when not challenged (right). **B)** When challenged with PCA,  
880 WT and  $\Delta hrcA$  *P. edwinii* colonies generate more reducing conditions. The larger zone of lower reducing  
881 potential in the  $\Delta hrcA$  mutant compared to WT when exposed to PCA is reflective of the larger internal  
882 volume this mutant creates. The addition of the *Aspergillus* isolate causes a further decrease in reduction  
883 potential that is sustained to greater depths (left right) **C)** The WT and  $\Delta hrcA$  *P. edwinii* colonies generate  
884 near-neutral pH conditions that show a trend of decreasing when exposed to PCA, and growing the  
885 fungus adjacent to *P. edwinii* colonies causes the internal environment to be more acidic (Left, Center).  
886 The *Aspergillus* isolate generates alkaline conditions when grown without PCA challenge, but generates a  
887 much more acidic environment when PCA is present (Right. Error bars for all microelectrode experiments  
888 represent standard deviation of three measurements at each depth. **D)** Addition of 5 mM HCl or citric acid  
889 causes an increase in PCA sequestration in *P. edwinii* colonies. Colonies were grown for 48 hrs at 30 °C.  
890 All adjacent colonies were grown 5 mm apart. Error bars represent standard deviation of four biological  
891 replicates. \*\* $p < 0.01$ .

892 **Fig. 6. The protection response is conserved in other Paraburkholderia species and shows partial**  
893 **specificity. A)** The ability to protect the *Aspergillus* isolate was tested among several species of  
894 Paraburkholderia. Left to right: No bacterium added, *P. unamae*, *P. SOS3*, and *P. phenazinium*. The  
895 protection response was present in *P. unamae* and *P. SOS3*, isolated from the roots of corn in Mexico and  
896 from top soil in Australia, respectively. *P. phenazinium*, itself a phenazine producer capable of producing  
897 iodinin, appeared to demonstrate no fungal growth. **B)** *P. edwinii* tested for gross ability to protect plant  
898 and human pathogenic fungi. From left to right: a phytopathogenic *Fusarium* species isolated in our lab,  
899 three opportunistic human pathogenic fungi isolated from the lungs of CF patients including *Aspergillus*  
900 *fumigatus* and two *Penicillium* species. White bars demonstrate the diameter of each fungus in PCA  
901 treated condition for comparison with the mixed co-colonies. All samples were grown for 48 hrs at 30 °C.

902

903

904

905

**Figure 1**

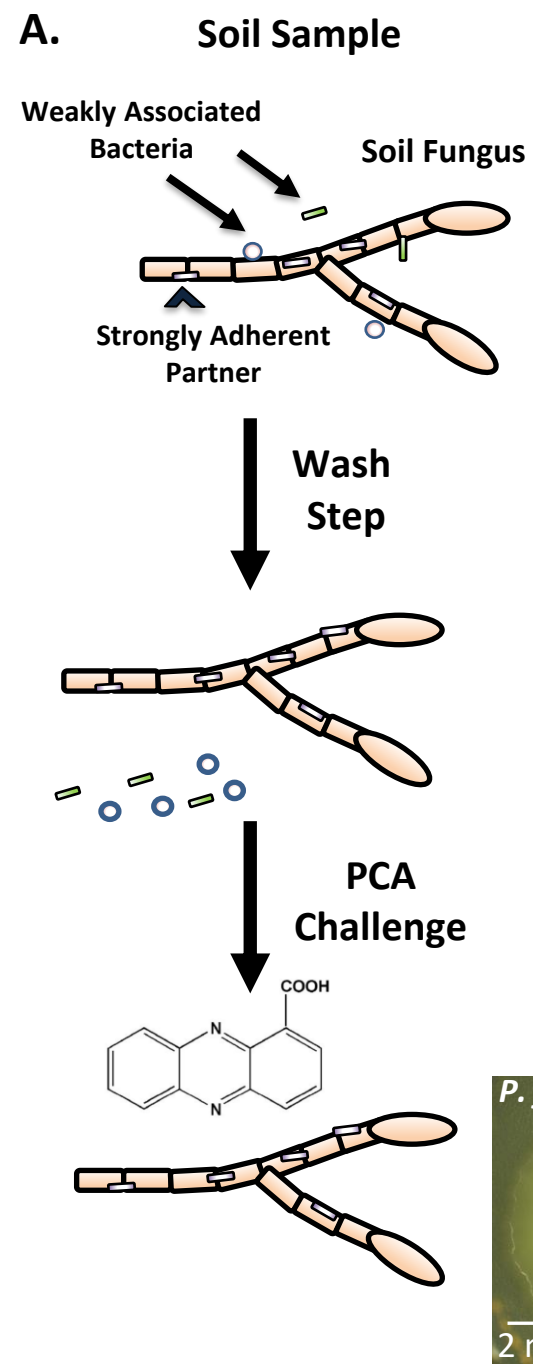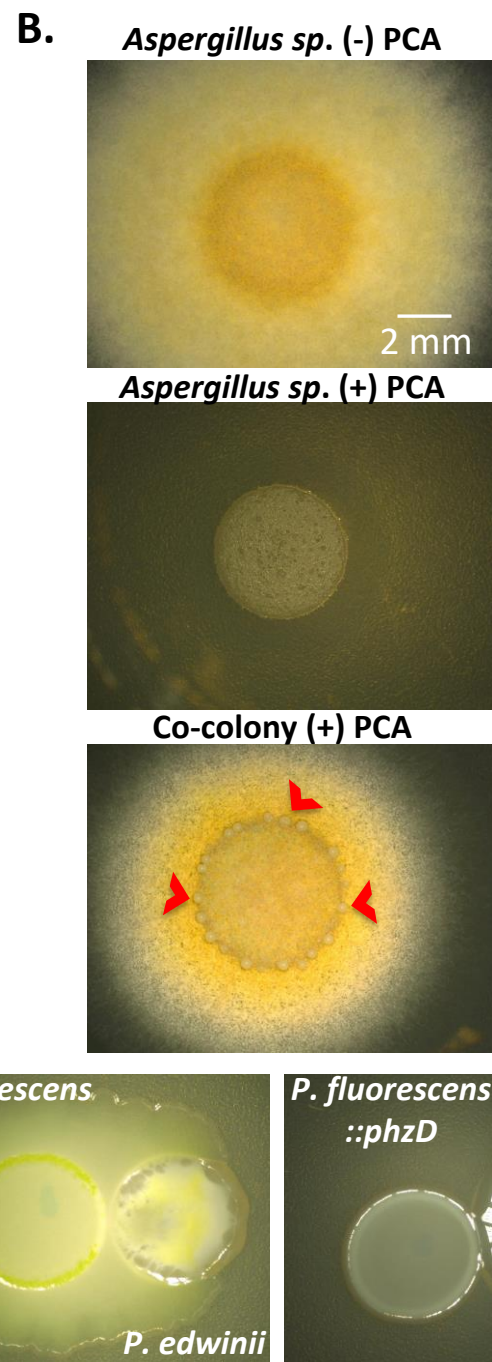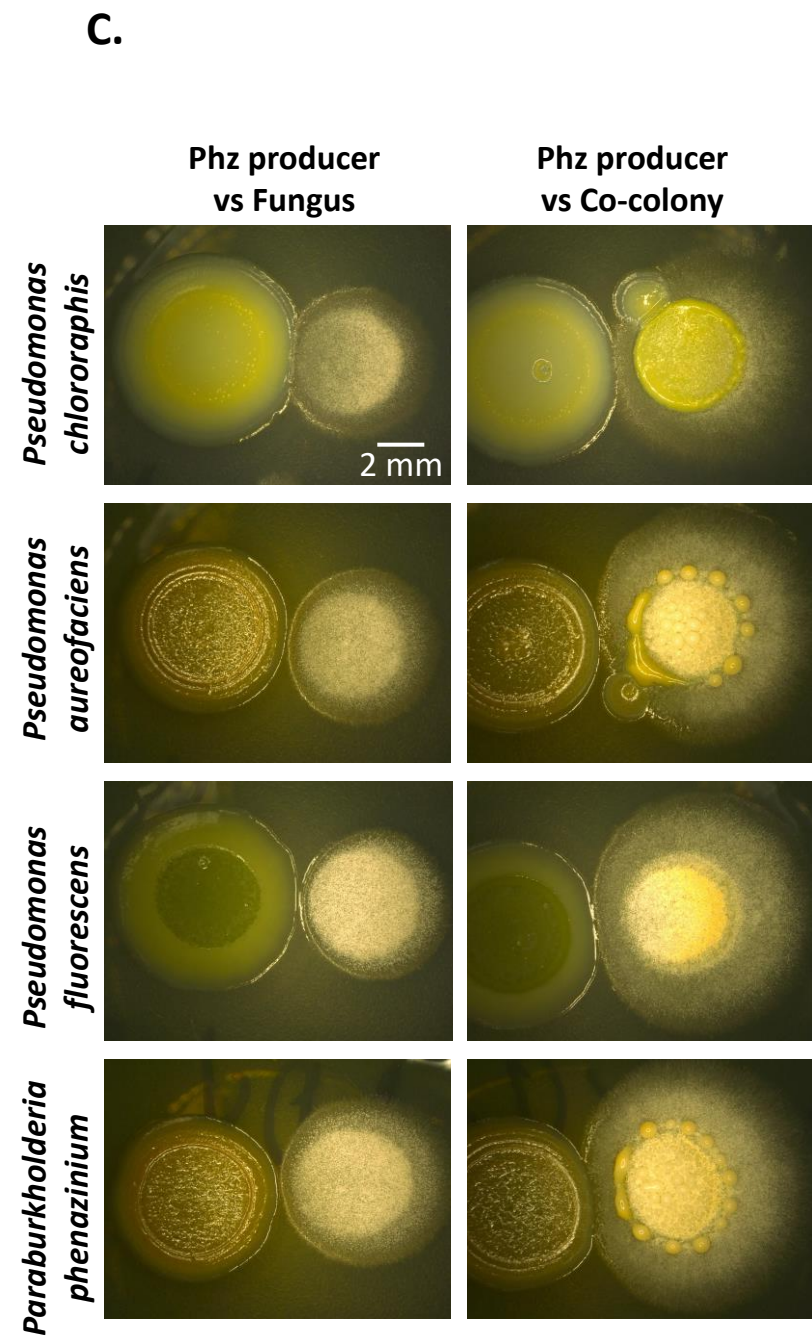

Figure 2

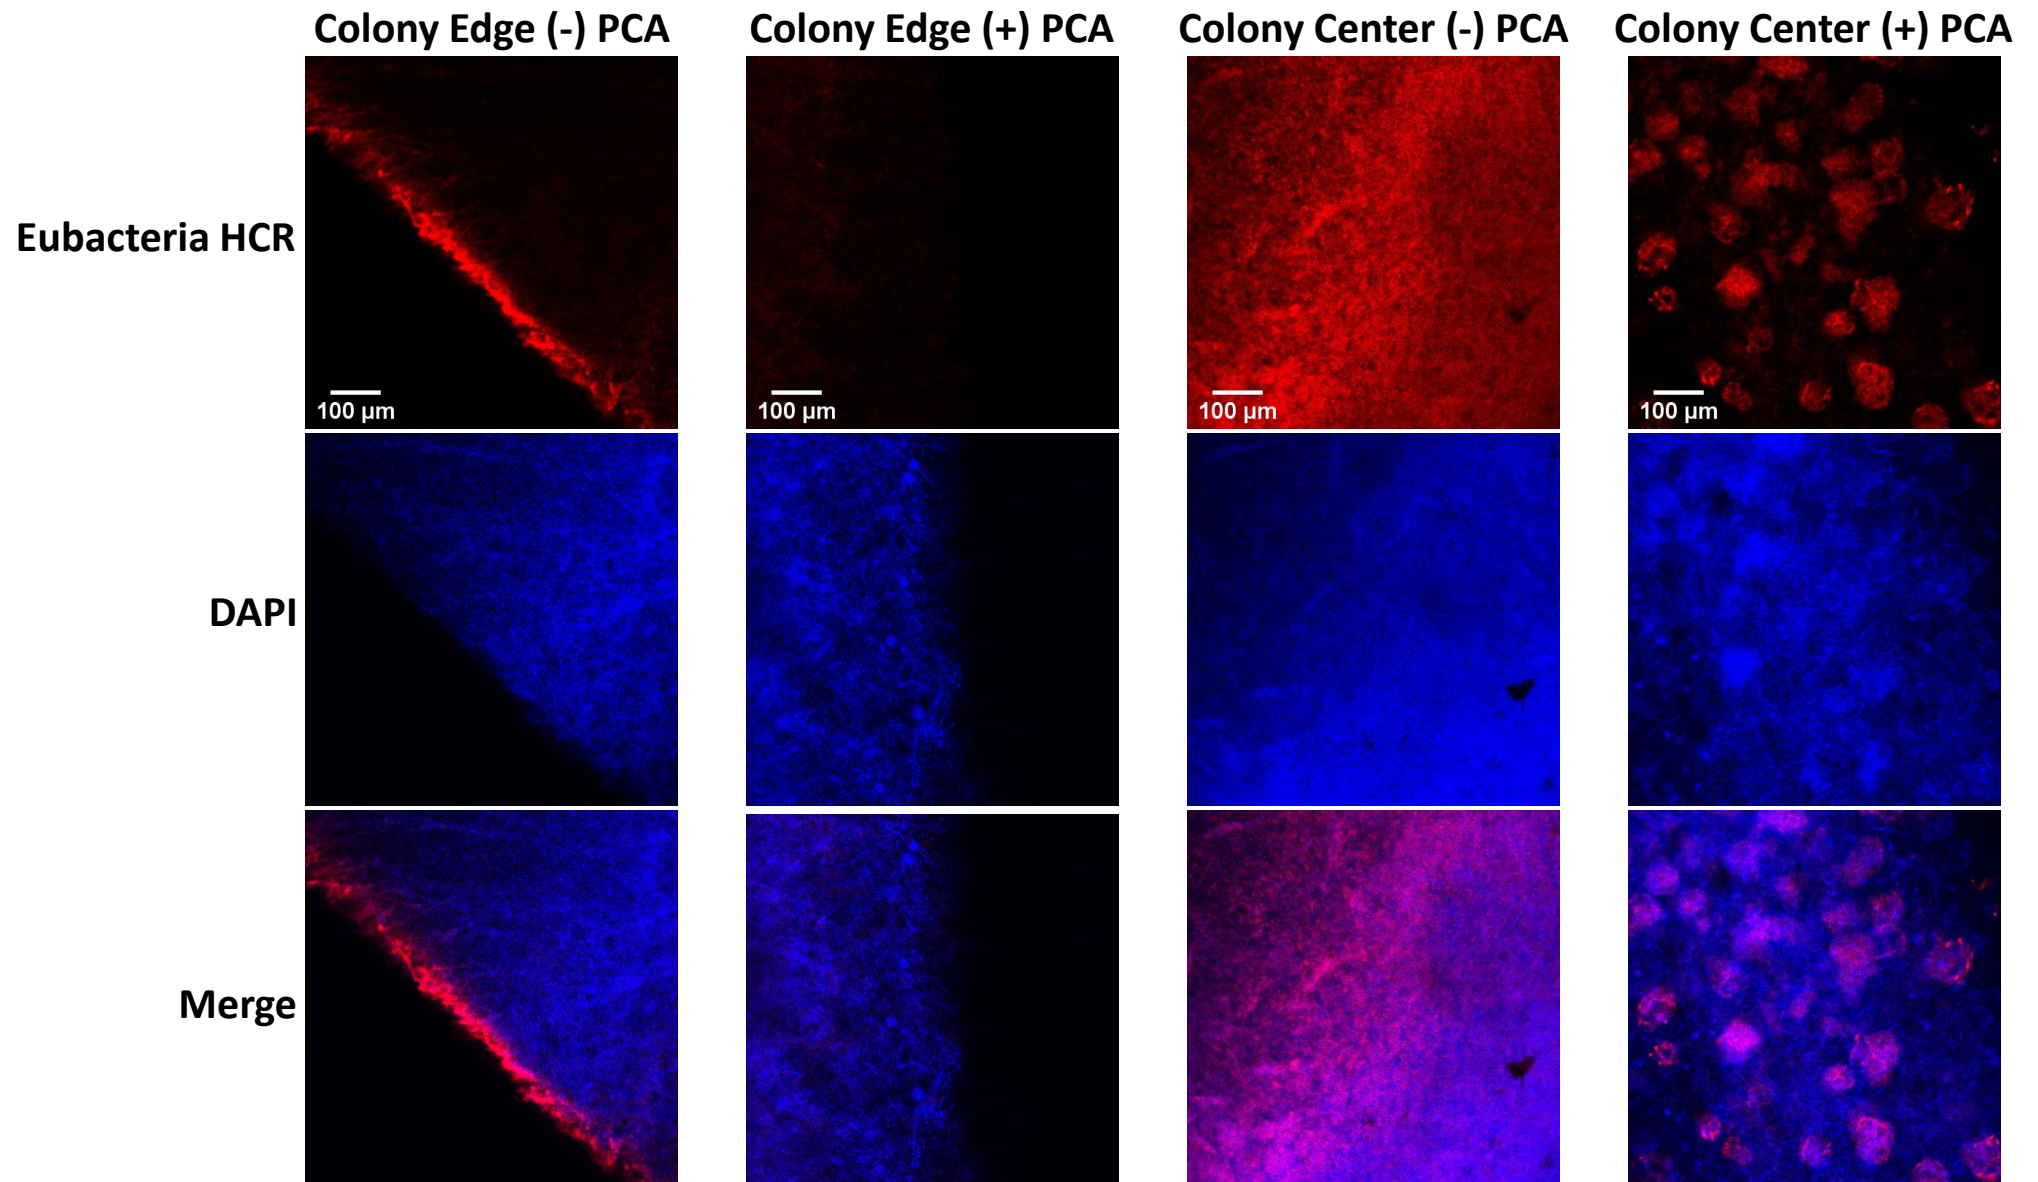

**Figure 3**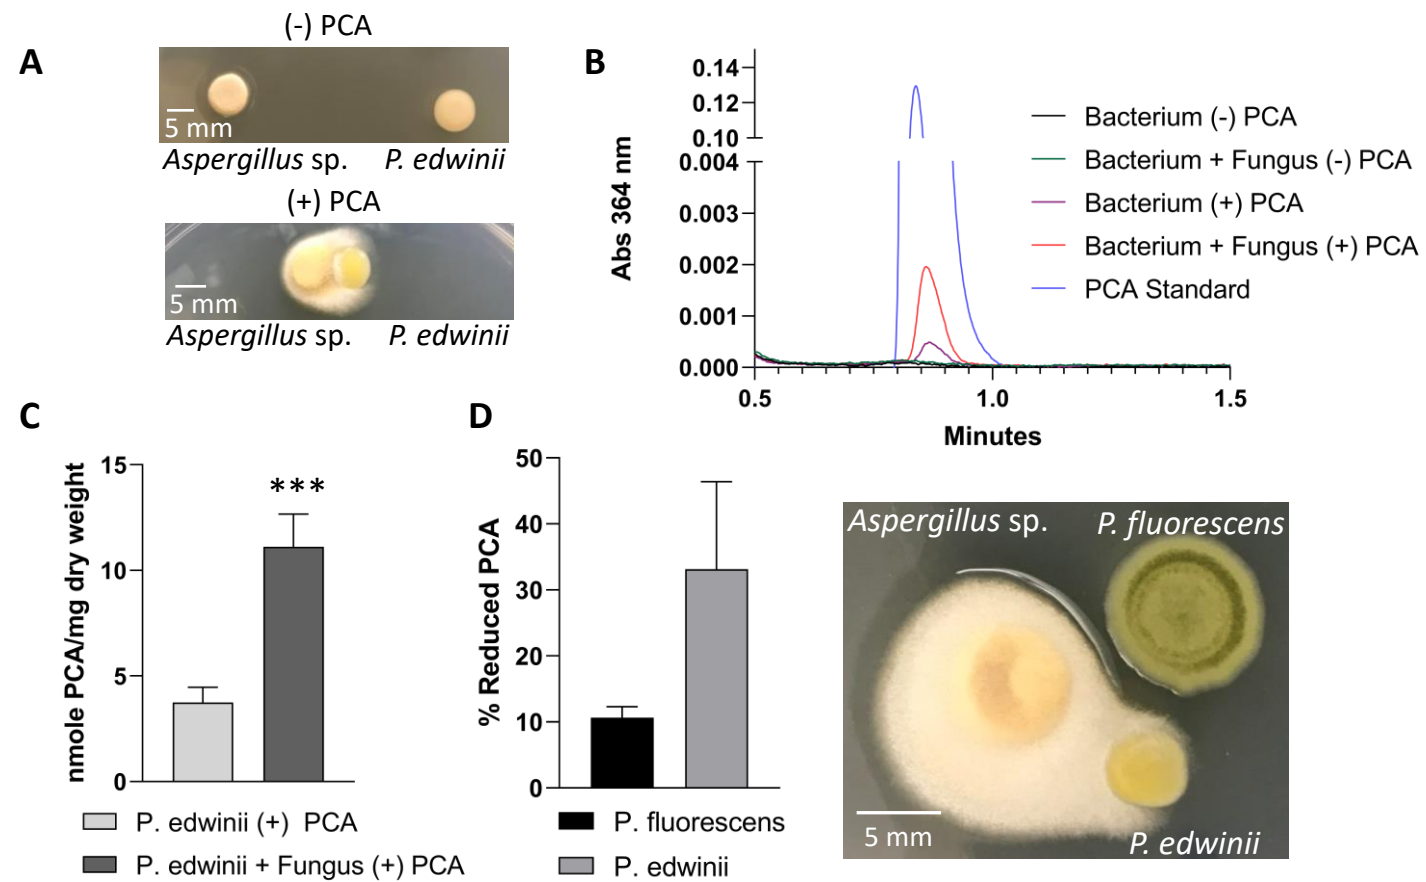

**Figure 4**

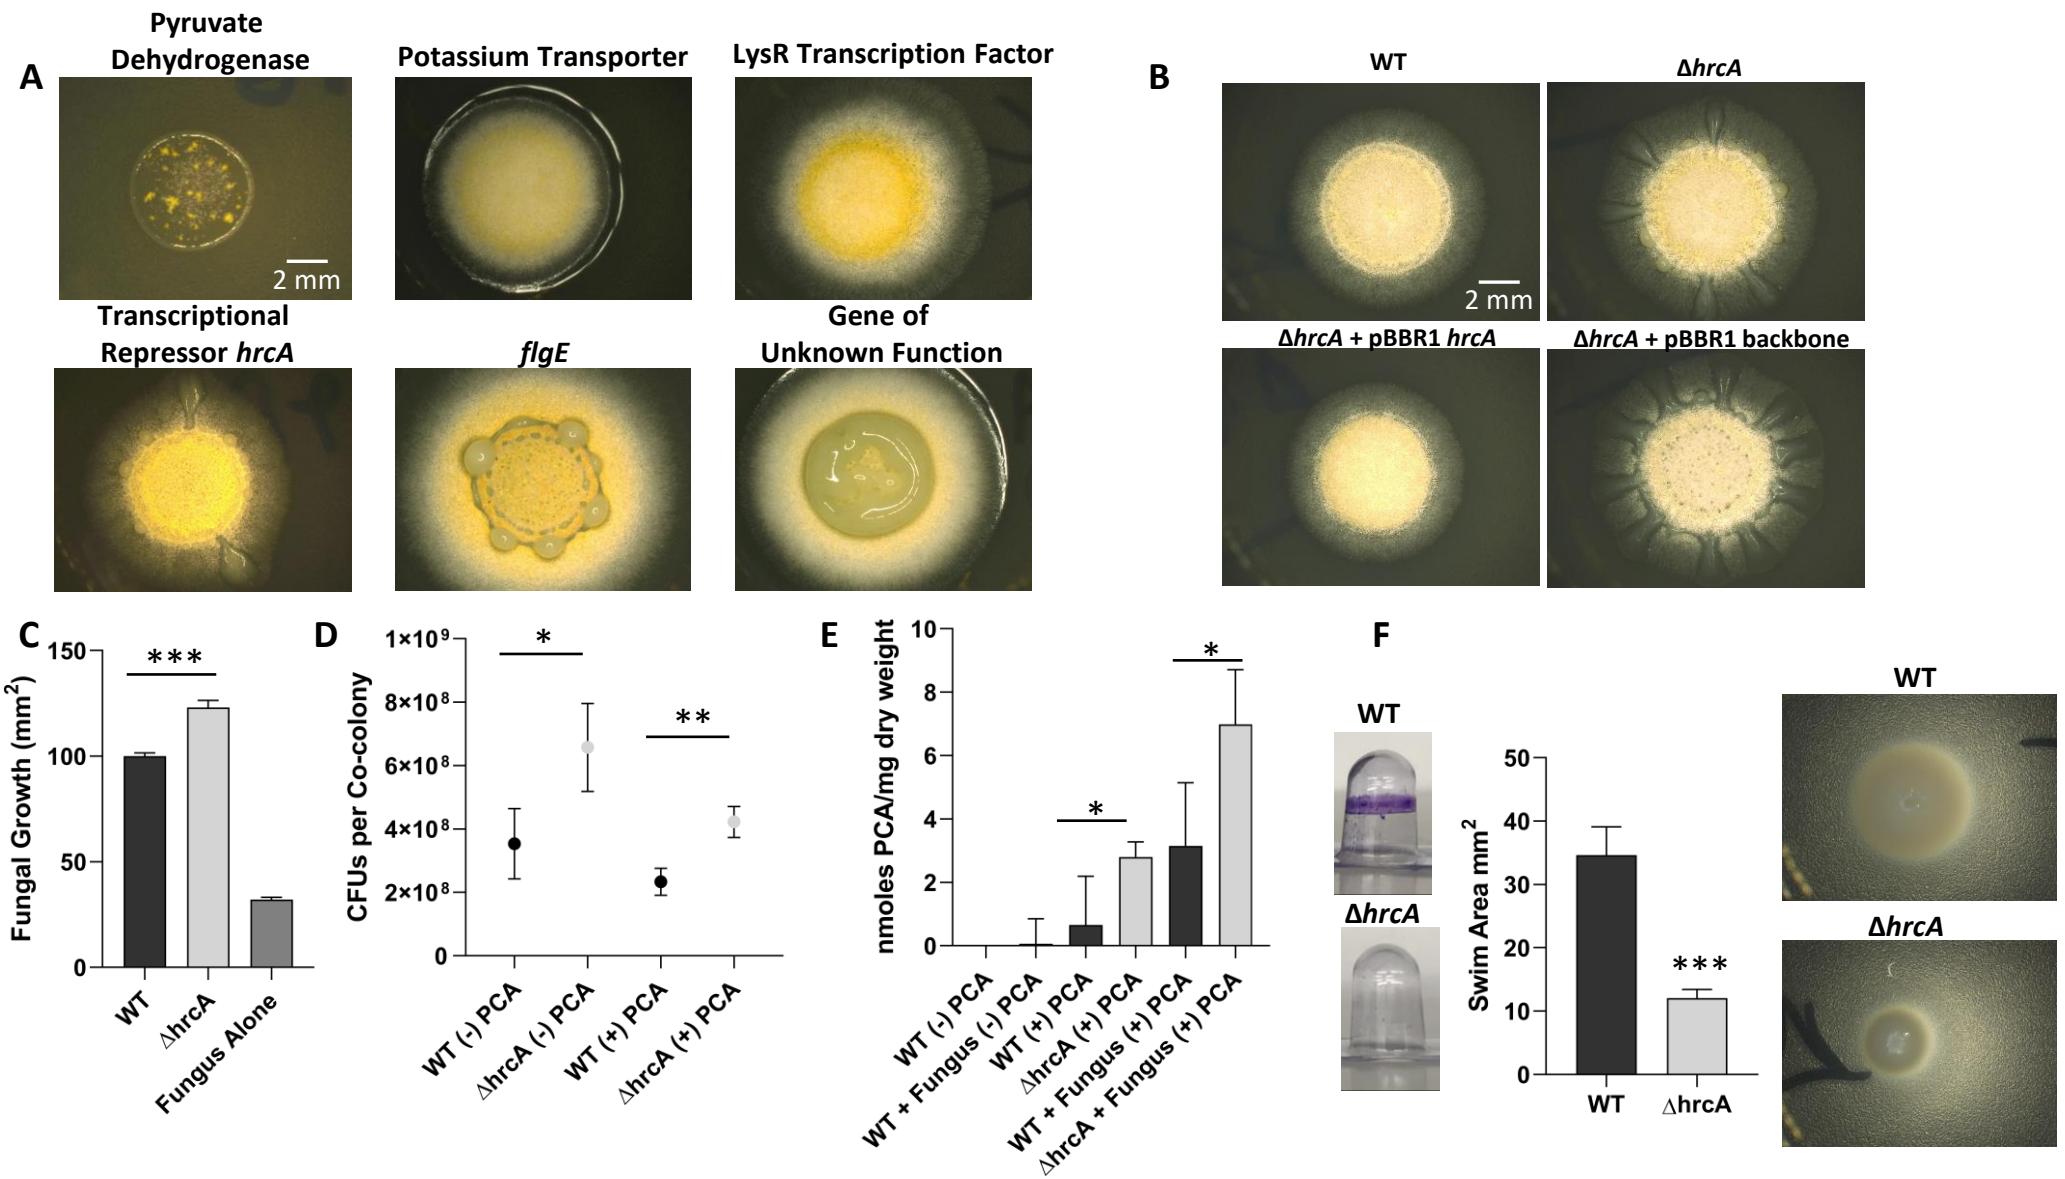

**Figure 5**

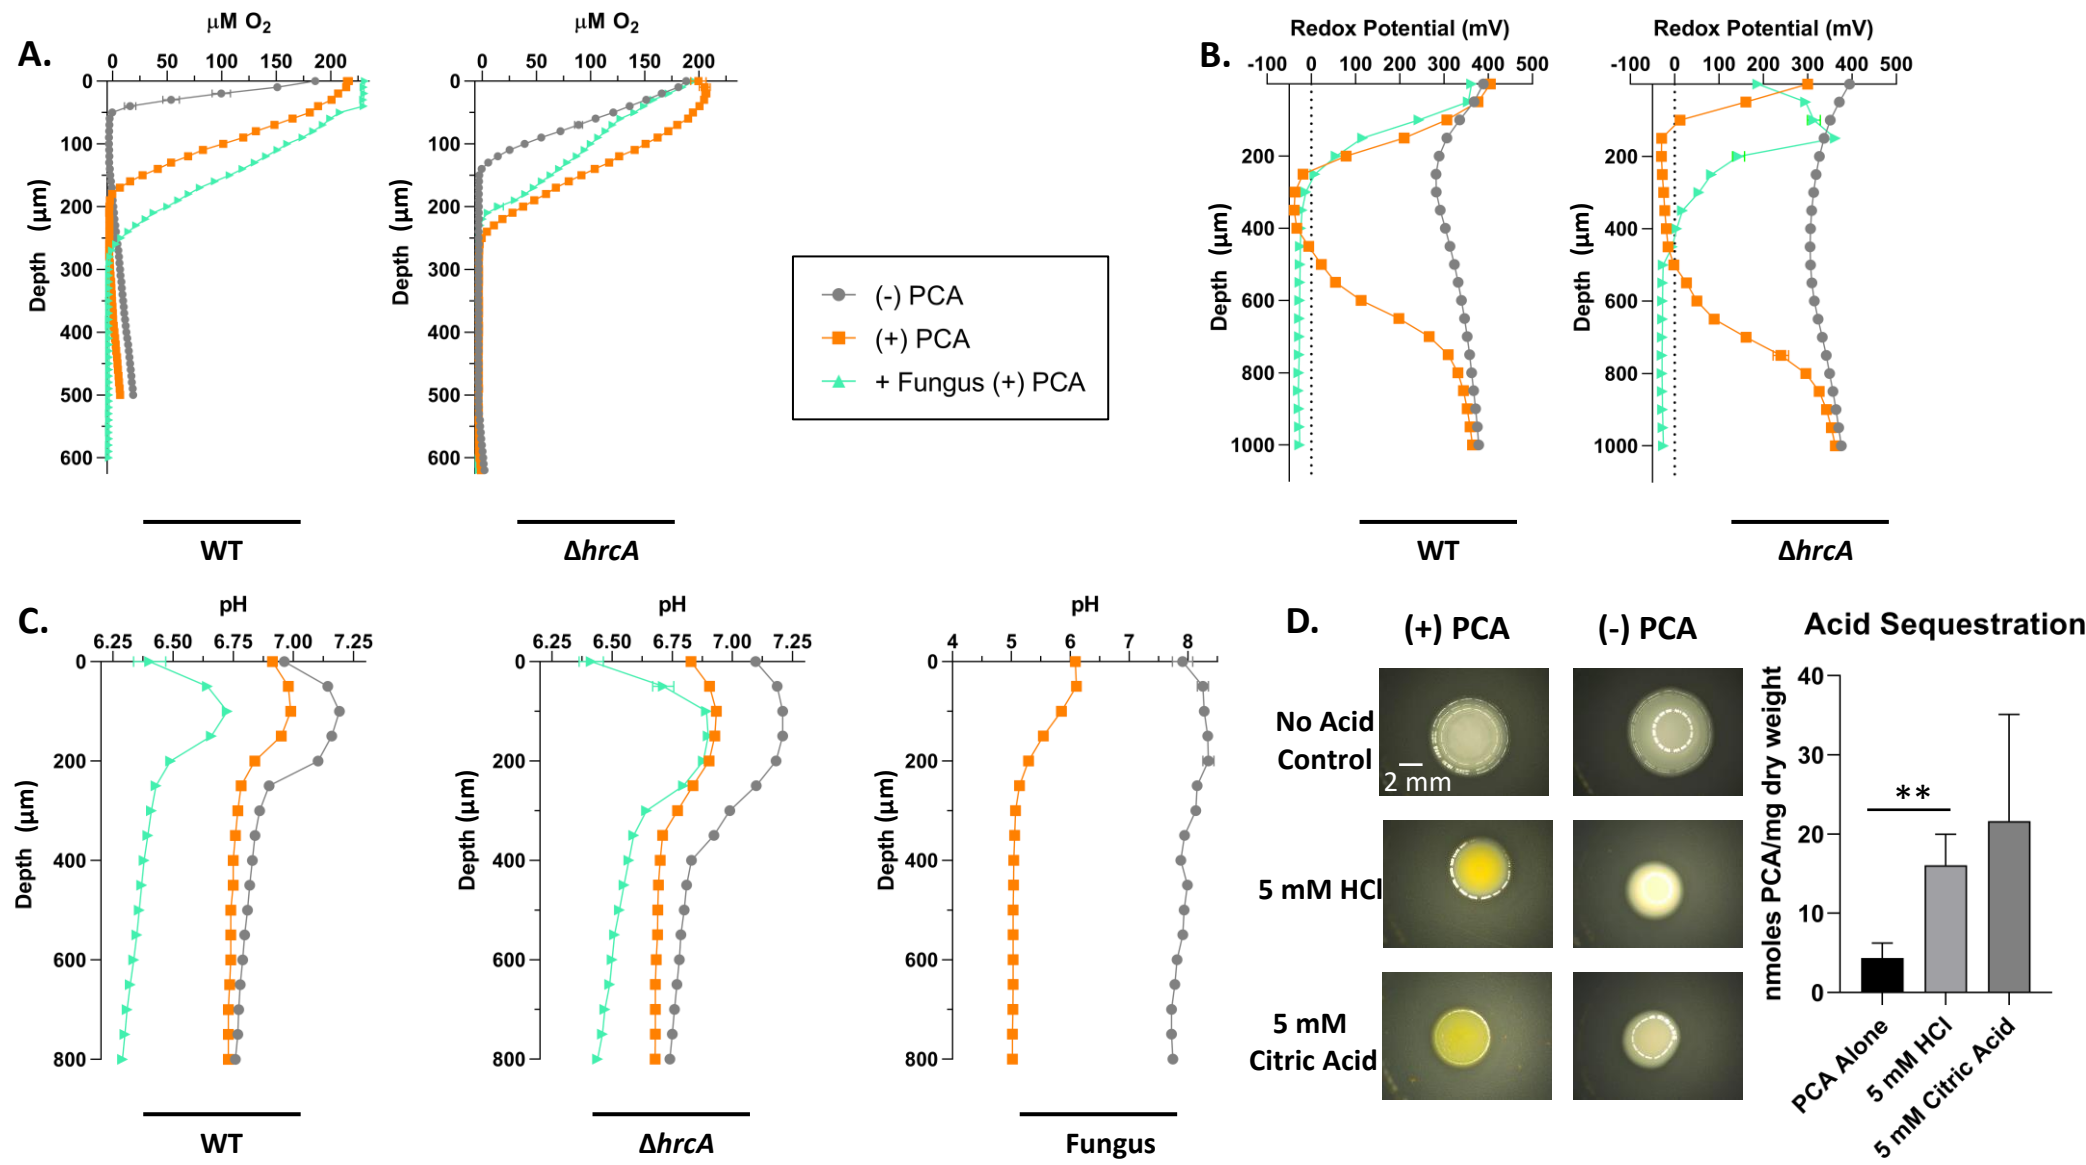

Figure 6

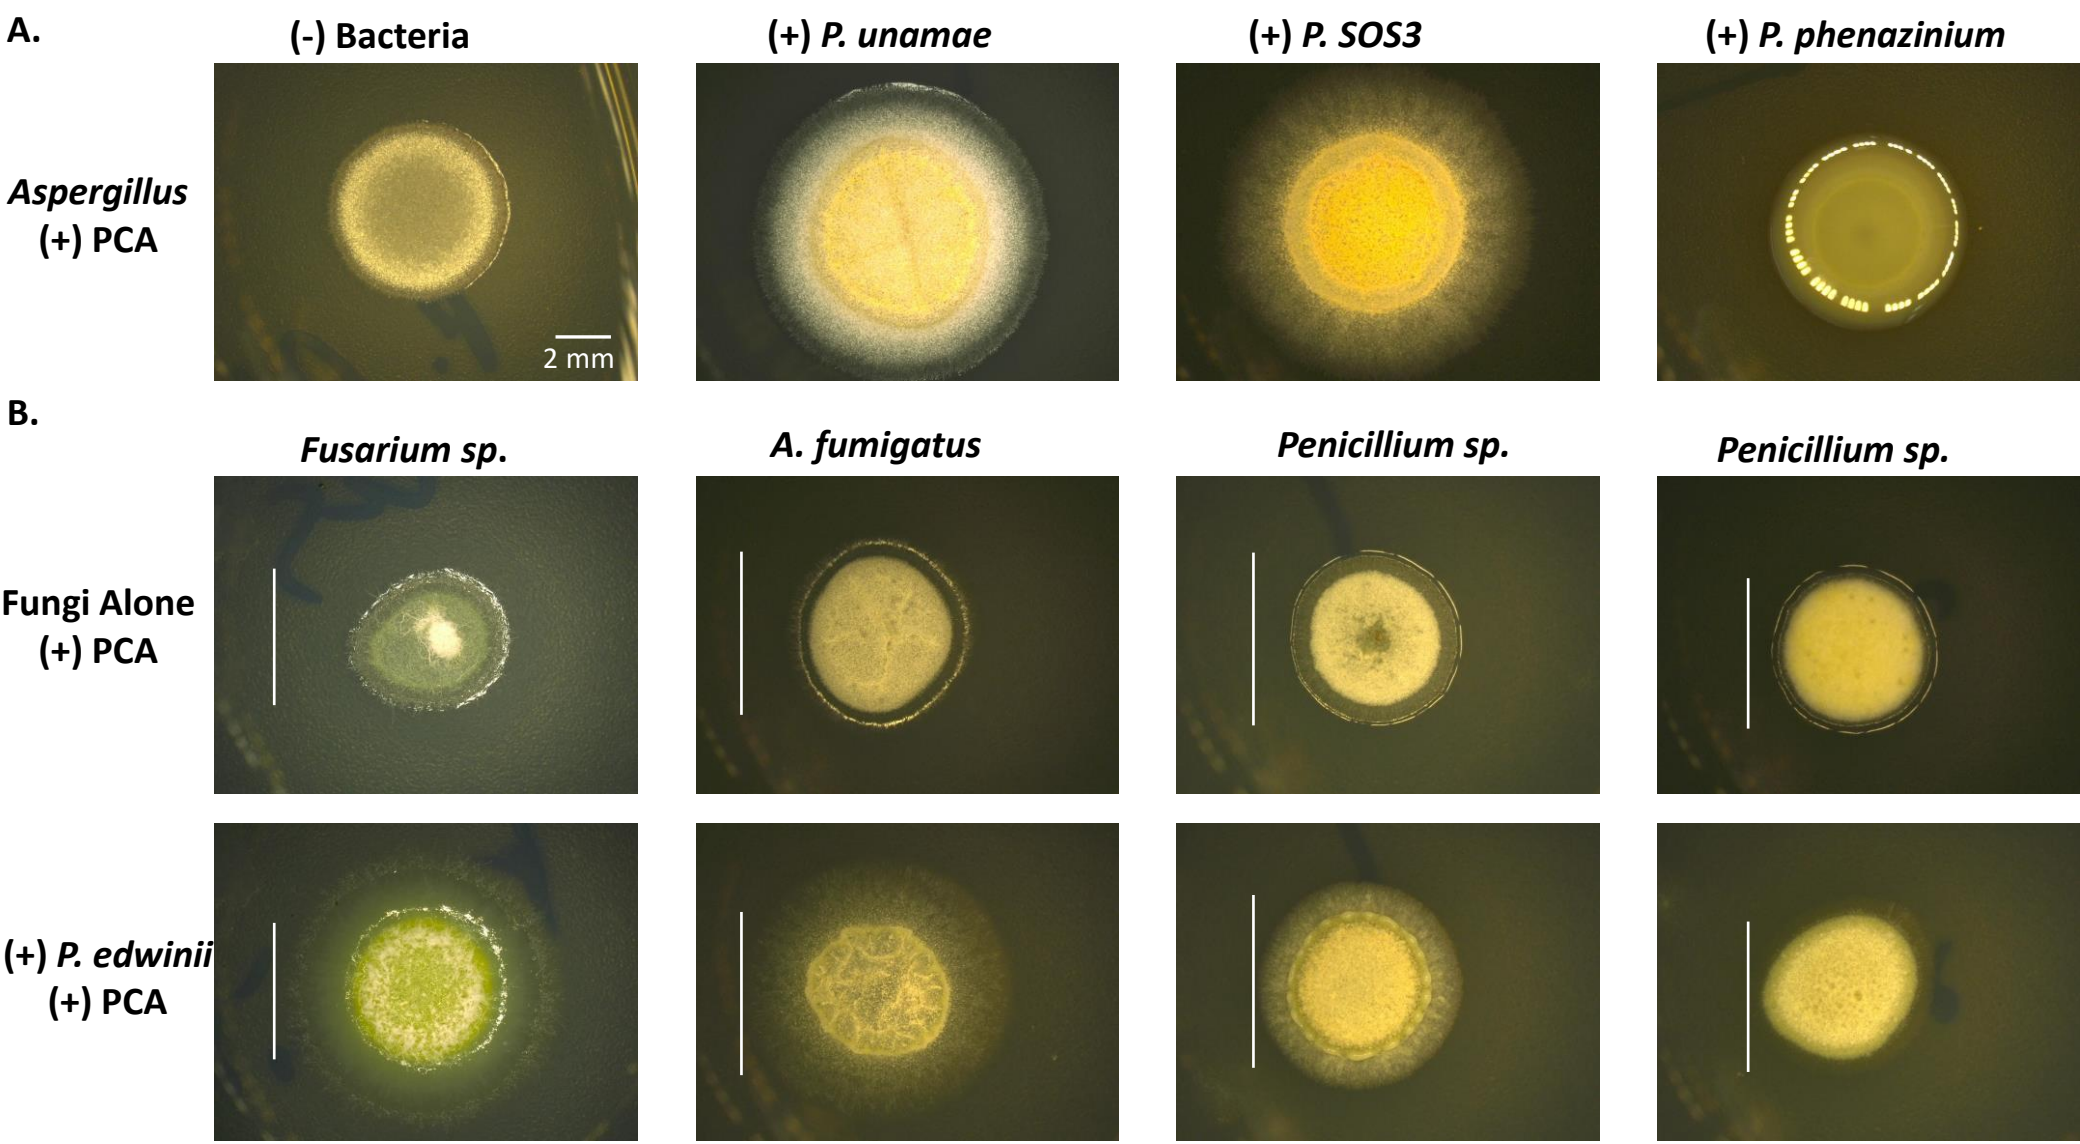

Source: https://www.biorxiv.org/content/10.1101/2021.03.28.437412v1.full.pdf
